# Supplementary material for: Mammal comparative tendon biology: advances in regulatory mechanisms through a computational modeling
Source: Front Vet Sci. 2023 Apr 27;10:1175346. doi: 10.3389/fvets.2023.1175346 (PMC10174257; doi:10.3389/fvets.2023.1175346)
Supplement: Supplementary file 10 [file Data_Sheet_10.xls]

## Sheet: mKEGG Enriched TendonNET
SUPPLEMENTARY FILE 10
#term ID	term description	observed gene count	background gene count	strength	false discovery rate	matching proteins in your network (IDs)	matching proteins in your network (labels)
mmu04350	TGF-beta signaling pathway	15	95	1.52	1.52e-15	10090.ENSMUSP00000002678,10090.ENSMUSP00000003687,10090.ENSMUSP00000007757,10090.ENSMUSP00000025393,10090.ENSMUSP00000026999,10090.ENSMUSP00000028836,10090.ENSMUSP00000029371,10090.ENSMUSP00000034973,10090.ENSMUSP00000035489,10090.ENSMUSP00000043849,10090.ENSMUSP00000062333,10090.ENSMUSP00000065983,10090.ENSMUSP00000090177,10090.ENSMUSP00000100924,10090.ENSMUSP00000130115	Tgfb1,Tgfb3,Tgfbr1,Smad4,Smad7,Bmp2,Smad9,Smad3,Fmod,Tgfb2,Tgfbr2,Mapk1,Smurf2,Dcn,Smad2
mmu04933	AGE-RAGE signaling pathway in diabetic complications	14	101	1.46	5.38e-14	10090.ENSMUSP00000001547,10090.ENSMUSP00000002678,10090.ENSMUSP00000003687,10090.ENSMUSP00000007757,10090.ENSMUSP00000025393,10090.ENSMUSP00000031668,10090.ENSMUSP00000034973,10090.ENSMUSP00000043849,10090.ENSMUSP00000056774,10090.ENSMUSP00000062333,10090.ENSMUSP00000065983,10090.ENSMUSP00000069616,10090.ENSMUSP00000085192,10090.ENSMUSP00000130115	Col1a1,Tgfb1,Tgfb3,Tgfbr1,Smad4,Col1a2,Smad3,Tgfb2,Pik3r1,Tgfbr2,Mapk1,Egr1,Col3a1,Smad2
mmu05226	Gastric cancer	13	147	1.26	8.76e-11	10090.ENSMUSP00000000187,10090.ENSMUSP00000002678,10090.ENSMUSP00000003687,10090.ENSMUSP00000007757,10090.ENSMUSP00000022246,10090.ENSMUSP00000025393,10090.ENSMUSP00000034973,10090.ENSMUSP00000043849,10090.ENSMUSP00000056752,10090.ENSMUSP00000056774,10090.ENSMUSP00000062333,10090.ENSMUSP00000065983,10090.ENSMUSP00000130115	Fgf6,Tgfb1,Tgfb3,Tgfbr1,Fgf10,Smad4,Smad3,Tgfb2,Fgf4,Pik3r1,Tgfbr2,Mapk1,Smad2
mmu05205	Proteoglycans in cancer	14	199	1.17	1.51e-10	10090.ENSMUSP00000001547,10090.ENSMUSP00000001812,10090.ENSMUSP00000002678,10090.ENSMUSP00000031668,10090.ENSMUSP00000040877,10090.ENSMUSP00000043849,10090.ENSMUSP00000056668,10090.ENSMUSP00000056774,10090.ENSMUSP00000064131,10090.ENSMUSP00000065983,10090.ENSMUSP00000098333,10090.ENSMUSP00000100924,10090.ENSMUSP00000128056,10090.ENSMUSP00000130115	Col1a1,Smo,Tgfb1,Col1a2,Lum,Tgfb2,Igf1,Pik3r1,Gpc3,Mapk1,Ptpn11,Dcn,Ihh,Smad2
mmu05212	Pancreatic cancer	10	74	1.45	5.57e-10	10090.ENSMUSP00000002678,10090.ENSMUSP00000003687,10090.ENSMUSP00000007757,10090.ENSMUSP00000025393,10090.ENSMUSP00000034973,10090.ENSMUSP00000043849,10090.ENSMUSP00000056774,10090.ENSMUSP00000062333,10090.ENSMUSP00000065983,10090.ENSMUSP00000130115	Tgfb1,Tgfb3,Tgfbr1,Smad4,Smad3,Tgfb2,Pik3r1,Tgfbr2,Mapk1,Smad2
mmu05220	Chronic myeloid leukemia	10	74	1.45	5.57e-10	10090.ENSMUSP00000002678,10090.ENSMUSP00000003687,10090.ENSMUSP00000007757,10090.ENSMUSP00000025393,10090.ENSMUSP00000034973,10090.ENSMUSP00000043849,10090.ENSMUSP00000056774,10090.ENSMUSP00000062333,10090.ENSMUSP00000065983,10090.ENSMUSP00000098333	Tgfb1,Tgfb3,Tgfbr1,Smad4,Smad3,Tgfb2,Pik3r1,Tgfbr2,Mapk1,Ptpn11
mmu05210	Colorectal cancer	10	88	1.37	1.91e-09	10090.ENSMUSP00000002678,10090.ENSMUSP00000003687,10090.ENSMUSP00000007757,10090.ENSMUSP00000025393,10090.ENSMUSP00000034973,10090.ENSMUSP00000043849,10090.ENSMUSP00000056774,10090.ENSMUSP00000062333,10090.ENSMUSP00000065983,10090.ENSMUSP00000130115	Tgfb1,Tgfb3,Tgfbr1,Smad4,Smad3,Tgfb2,Pik3r1,Tgfbr2,Mapk1,Smad2
mmu05200	Pathways in cancer	18	528	0.85	4.59e-09	10090.ENSMUSP00000000187,10090.ENSMUSP00000001812,10090.ENSMUSP00000002678,10090.ENSMUSP00000003687,10090.ENSMUSP00000007757,10090.ENSMUSP00000022246,10090.ENSMUSP00000025393,10090.ENSMUSP00000026474,10090.ENSMUSP00000028836,10090.ENSMUSP00000034973,10090.ENSMUSP00000043849,10090.ENSMUSP00000056668,10090.ENSMUSP00000056752,10090.ENSMUSP00000056774,10090.ENSMUSP00000062333,10090.ENSMUSP00000065983…	Fgf6,Smo,Tgfb1,Tgfb3,Tgfbr1,Fgf10,Smad4,Gli1,Bmp2,Smad3,Tgfb2,Igf1,Fgf4,Pik3r1,Tgfbr2,Mapk1,Cxcl12,Smad2
mmu04390	Hippo signaling pathway	11	156	1.17	1.77e-08	10090.ENSMUSP00000000299,10090.ENSMUSP00000002678,10090.ENSMUSP00000003687,10090.ENSMUSP00000007757,10090.ENSMUSP00000025393,10090.ENSMUSP00000026999,10090.ENSMUSP00000028836,10090.ENSMUSP00000034973,10090.ENSMUSP00000043849,10090.ENSMUSP00000062333,10090.ENSMUSP00000130115	Itgb2,Tgfb1,Tgfb3,Tgfbr1,Smad4,Smad7,Bmp2,Smad3,Tgfb2,Tgfbr2,Smad2
mmu04068	FoxO signaling pathway	10	130	1.2	4.63e-08	10090.ENSMUSP00000002678,10090.ENSMUSP00000003687,10090.ENSMUSP00000007757,10090.ENSMUSP00000025393,10090.ENSMUSP00000034973,10090.ENSMUSP00000043849,10090.ENSMUSP00000056668,10090.ENSMUSP00000056774,10090.ENSMUSP00000062333,10090.ENSMUSP00000065983	Tgfb1,Tgfb3,Tgfbr1,Smad4,Smad3,Tgfb2,Igf1,Pik3r1,Tgfbr2,Mapk1
mmu05166	Human T-cell leukemia virus 1 infection	12	231	1.03	6.18e-08	10090.ENSMUSP00000000299,10090.ENSMUSP00000002678,10090.ENSMUSP00000003687,10090.ENSMUSP00000007757,10090.ENSMUSP00000025393,10090.ENSMUSP00000034973,10090.ENSMUSP00000043849,10090.ENSMUSP00000056774,10090.ENSMUSP00000062333,10090.ENSMUSP00000065983,10090.ENSMUSP00000069616,10090.ENSMUSP00000130115	Itgb2,Tgfb1,Tgfb3,Tgfbr1,Smad4,Smad3,Tgfb2,Pik3r1,Tgfbr2,Mapk1,Egr1,Smad2
mmu04151	PI3K-Akt signaling pathway	14	355	0.91	7.24e-08	10090.ENSMUSP00000000122,10090.ENSMUSP00000000187,10090.ENSMUSP00000001547,10090.ENSMUSP00000022213,10090.ENSMUSP00000022246,10090.ENSMUSP00000023123,10090.ENSMUSP00000031668,10090.ENSMUSP00000056668,10090.ENSMUSP00000056752,10090.ENSMUSP00000056774,10090.ENSMUSP00000065983,10090.ENSMUSP00000102538,10090.ENSMUSP00000102995,10090.ENSMUSP00000128308	Ngfr,Fgf6,Col1a1,Thbs4,Fgf10,Col2a1,Col1a2,Igf1,Fgf4,Pik3r1,Mapk1,Ngf,Tnc,Thbs2
mmu05225	Hepatocellular carcinoma	10	168	1.09	3.64e-07	10090.ENSMUSP00000002678,10090.ENSMUSP00000003687,10090.ENSMUSP00000007757,10090.ENSMUSP00000025393,10090.ENSMUSP00000034973,10090.ENSMUSP00000043849,10090.ENSMUSP00000056774,10090.ENSMUSP00000062333,10090.ENSMUSP00000065983,10090.ENSMUSP00000130115	Tgfb1,Tgfb3,Tgfbr1,Smad4,Smad3,Tgfb2,Pik3r1,Tgfbr2,Mapk1,Smad2
mmu04926	Relaxin signaling pathway	9	127	1.17	4.46e-07	10090.ENSMUSP00000001547,10090.ENSMUSP00000002678,10090.ENSMUSP00000007757,10090.ENSMUSP00000031668,10090.ENSMUSP00000056774,10090.ENSMUSP00000062333,10090.ENSMUSP00000065983,10090.ENSMUSP00000085192,10090.ENSMUSP00000130115	Col1a1,Tgfb1,Tgfbr1,Col1a2,Pik3r1,Tgfbr2,Mapk1,Col3a1,Smad2
mmu04010	MAPK signaling pathway	12	289	0.94	4.96e-07	10090.ENSMUSP00000000122,10090.ENSMUSP00000000187,10090.ENSMUSP00000002678,10090.ENSMUSP00000003687,10090.ENSMUSP00000007757,10090.ENSMUSP00000022246,10090.ENSMUSP00000043849,10090.ENSMUSP00000056668,10090.ENSMUSP00000056752,10090.ENSMUSP00000062333,10090.ENSMUSP00000065983,10090.ENSMUSP00000102538	Ngfr,Fgf6,Tgfb1,Tgfb3,Tgfbr1,Fgf10,Tgfb2,Igf1,Fgf4,Tgfbr2,Mapk1,Ngf
mmu05142	Chagas disease	8	100	1.22	1.03e-06	10090.ENSMUSP00000002678,10090.ENSMUSP00000003687,10090.ENSMUSP00000007757,10090.ENSMUSP00000043849,10090.ENSMUSP00000056774,10090.ENSMUSP00000062333,10090.ENSMUSP00000065983,10090.ENSMUSP00000130115	Tgfb1,Tgfb3,Tgfbr1,Tgfb2,Pik3r1,Tgfbr2,Mapk1,Smad2
mmu05146	Amoebiasis	8	105	1.2	1.39e-06	10090.ENSMUSP00000000299,10090.ENSMUSP00000001547,10090.ENSMUSP00000002678,10090.ENSMUSP00000003687,10090.ENSMUSP00000031668,10090.ENSMUSP00000043849,10090.ENSMUSP00000056774,10090.ENSMUSP00000085192	Itgb2,Col1a1,Tgfb1,Tgfb3,Col1a2,Tgfb2,Pik3r1,Col3a1
mmu04015	Rap1 signaling pathway	10	208	1.0	1.69e-06	10090.ENSMUSP00000000122,10090.ENSMUSP00000000187,10090.ENSMUSP00000000299,10090.ENSMUSP00000022246,10090.ENSMUSP00000047387,10090.ENSMUSP00000056668,10090.ENSMUSP00000056752,10090.ENSMUSP00000056774,10090.ENSMUSP00000065983,10090.ENSMUSP00000102538	Ngfr,Fgf6,Itgb2,Fgf10,Dock4,Igf1,Fgf4,Pik3r1,Mapk1,Ngf
mmu05161	Hepatitis B	9	161	1.07	2.15e-06	10090.ENSMUSP00000002678,10090.ENSMUSP00000003687,10090.ENSMUSP00000007757,10090.ENSMUSP00000025393,10090.ENSMUSP00000034973,10090.ENSMUSP00000043849,10090.ENSMUSP00000056774,10090.ENSMUSP00000062333,10090.ENSMUSP00000065983	Tgfb1,Tgfb3,Tgfbr1,Smad4,Smad3,Tgfb2,Pik3r1,Tgfbr2,Mapk1
mmu04218	Cellular senescence	9	167	1.05	2.75e-06	10090.ENSMUSP00000002678,10090.ENSMUSP00000003687,10090.ENSMUSP00000007757,10090.ENSMUSP00000034973,10090.ENSMUSP00000043849,10090.ENSMUSP00000056774,10090.ENSMUSP00000062333,10090.ENSMUSP00000065983,10090.ENSMUSP00000130115	Tgfb1,Tgfb3,Tgfbr1,Smad3,Tgfb2,Pik3r1,Tgfbr2,Mapk1,Smad2
mmu05144	Malaria	6	53	1.37	5.76e-06	10090.ENSMUSP00000000299,10090.ENSMUSP00000002678,10090.ENSMUSP00000003687,10090.ENSMUSP00000022213,10090.ENSMUSP00000043849,10090.ENSMUSP00000128308	Itgb2,Tgfb1,Tgfb3,Thbs4,Tgfb2,Thbs2
mmu04550	Signaling pathways regulating pluripotency of stem cells	8	137	1.08	7.03e-06	10090.ENSMUSP00000000445,10090.ENSMUSP00000025393,10090.ENSMUSP00000029371,10090.ENSMUSP00000034973,10090.ENSMUSP00000056668,10090.ENSMUSP00000056774,10090.ENSMUSP00000065983,10090.ENSMUSP00000130115	Myf5,Smad4,Smad9,Smad3,Igf1,Pik3r1,Mapk1,Smad2
mmu04510	Focal adhesion	9	196	0.98	8.73e-06	10090.ENSMUSP00000001547,10090.ENSMUSP00000022213,10090.ENSMUSP00000023123,10090.ENSMUSP00000031668,10090.ENSMUSP00000056668,10090.ENSMUSP00000056774,10090.ENSMUSP00000065983,10090.ENSMUSP00000102995,10090.ENSMUSP00000128308	Col1a1,Thbs4,Col2a1,Col1a2,Igf1,Pik3r1,Mapk1,Tnc,Thbs2
mmu04659	Th17 cell differentiation	7	101	1.16	1.17e-05	10090.ENSMUSP00000002678,10090.ENSMUSP00000007757,10090.ENSMUSP00000025393,10090.ENSMUSP00000034973,10090.ENSMUSP00000062333,10090.ENSMUSP00000065983,10090.ENSMUSP00000130115	Tgfb1,Tgfbr1,Smad4,Smad3,Tgfbr2,Mapk1,Smad2
mmu05211	Renal cell carcinoma	6	66	1.28	1.61e-05	10090.ENSMUSP00000002678,10090.ENSMUSP00000003687,10090.ENSMUSP00000043849,10090.ENSMUSP00000056774,10090.ENSMUSP00000065983,10090.ENSMUSP00000098333	Tgfb1,Tgfb3,Tgfb2,Pik3r1,Mapk1,Ptpn11
mmu04014	Ras signaling pathway	9	224	0.92	2.25e-05	10090.ENSMUSP00000000122,10090.ENSMUSP00000000187,10090.ENSMUSP00000022246,10090.ENSMUSP00000056668,10090.ENSMUSP00000056752,10090.ENSMUSP00000056774,10090.ENSMUSP00000065983,10090.ENSMUSP00000098333,10090.ENSMUSP00000102538	Ngfr,Fgf6,Fgf10,Igf1,Fgf4,Pik3r1,Mapk1,Ptpn11,Ngf
mmu05218	Melanoma	6	71	1.24	2.25e-05	10090.ENSMUSP00000000187,10090.ENSMUSP00000022246,10090.ENSMUSP00000056668,10090.ENSMUSP00000056752,10090.ENSMUSP00000056774,10090.ENSMUSP00000065983	Fgf6,Fgf10,Igf1,Fgf4,Pik3r1,Mapk1
mmu04371	Apelin signaling pathway	7	133	1.04	5.74e-05	10090.ENSMUSP00000007757,10090.ENSMUSP00000025393,10090.ENSMUSP00000034973,10090.ENSMUSP00000065983,10090.ENSMUSP00000069616,10090.ENSMUSP00000095249,10090.ENSMUSP00000130115	Tgfbr1,Smad4,Smad3,Mapk1,Egr1,Hdac4,Smad2
mmu04512	ECM-receptor interaction	6	87	1.16	6.26e-05	10090.ENSMUSP00000001547,10090.ENSMUSP00000022213,10090.ENSMUSP00000023123,10090.ENSMUSP00000031668,10090.ENSMUSP00000102995,10090.ENSMUSP00000128308	Col1a1,Thbs4,Col2a1,Col1a2,Tnc,Thbs2
mmu04060	Cytokine-cytokine receptor interaction	9	279	0.83	0.00011	10090.ENSMUSP00000000122,10090.ENSMUSP00000002678,10090.ENSMUSP00000003687,10090.ENSMUSP00000007757,10090.ENSMUSP00000028836,10090.ENSMUSP00000043849,10090.ENSMUSP00000062333,10090.ENSMUSP00000072800,10090.ENSMUSP00000102538	Ngfr,Tgfb1,Tgfb3,Tgfbr1,Bmp2,Tgfb2,Tgfbr2,Cxcl12,Ngf
mmu05321	Inflammatory bowel disease	5	61	1.23	0.00017	10090.ENSMUSP00000002678,10090.ENSMUSP00000003687,10090.ENSMUSP00000034973,10090.ENSMUSP00000043849,10090.ENSMUSP00000130115	Tgfb1,Tgfb3,Smad3,Tgfb2,Smad2
mmu05140	Leishmaniasis	5	67	1.19	0.00025	10090.ENSMUSP00000000299,10090.ENSMUSP00000002678,10090.ENSMUSP00000003687,10090.ENSMUSP00000043849,10090.ENSMUSP00000065983	Itgb2,Tgfb1,Tgfb3,Tgfb2,Mapk1
mmu04520	Adherens junction	5	69	1.18	0.00028	10090.ENSMUSP00000007757,10090.ENSMUSP00000025393,10090.ENSMUSP00000034973,10090.ENSMUSP00000062333,10090.ENSMUSP00000065983	Tgfbr1,Smad4,Smad3,Tgfbr2,Mapk1
mmu04110	Cell cycle	6	122	1.01	0.00032	10090.ENSMUSP00000002678,10090.ENSMUSP00000003687,10090.ENSMUSP00000025393,10090.ENSMUSP00000034973,10090.ENSMUSP00000043849,10090.ENSMUSP00000130115	Tgfb1,Tgfb3,Smad4,Smad3,Tgfb2,Smad2
mmu04380	Osteoclast differentiation	6	121	1.01	0.00032	10090.ENSMUSP00000002678,10090.ENSMUSP00000007757,10090.ENSMUSP00000043849,10090.ENSMUSP00000056774,10090.ENSMUSP00000062333,10090.ENSMUSP00000065983	Tgfb1,Tgfbr1,Tgfb2,Pik3r1,Tgfbr2,Mapk1
mmu05323	Rheumatoid arthritis	5	86	1.08	0.00069	10090.ENSMUSP00000000299,10090.ENSMUSP00000002678,10090.ENSMUSP00000003687,10090.ENSMUSP00000043849,10090.ENSMUSP00000072800	Itgb2,Tgfb1,Tgfb3,Tgfb2,Cxcl12
mmu04810	Regulation of actin cytoskeleton	7	212	0.84	0.00077	10090.ENSMUSP00000000187,10090.ENSMUSP00000000299,10090.ENSMUSP00000022246,10090.ENSMUSP00000056752,10090.ENSMUSP00000056774,10090.ENSMUSP00000065983,10090.ENSMUSP00000072800	Fgf6,Itgb2,Fgf10,Fgf4,Pik3r1,Mapk1,Cxcl12
mmu05224	Breast cancer	6	145	0.93	0.00077	10090.ENSMUSP00000000187,10090.ENSMUSP00000022246,10090.ENSMUSP00000056668,10090.ENSMUSP00000056752,10090.ENSMUSP00000056774,10090.ENSMUSP00000065983	Fgf6,Fgf10,Igf1,Fgf4,Pik3r1,Mapk1
mmu04340	Hedgehog signaling pathway	4	49	1.23	0.0010	10090.ENSMUSP00000001812,10090.ENSMUSP00000026474,10090.ENSMUSP00000090177,10090.ENSMUSP00000128056	Smo,Gli1,Smurf2,Ihh
mmu04360	Axon guidance	6	176	0.85	0.0020	10090.ENSMUSP00000001812,10090.ENSMUSP00000056774,10090.ENSMUSP00000065983,10090.ENSMUSP00000066554,10090.ENSMUSP00000072800,10090.ENSMUSP00000098333	Smo,Pik3r1,Mapk1,Epha3,Cxcl12,Ptpn11
mmu05165	Human papillomavirus infection	8	342	0.69	0.0022	10090.ENSMUSP00000001547,10090.ENSMUSP00000022213,10090.ENSMUSP00000023123,10090.ENSMUSP00000031668,10090.ENSMUSP00000056774,10090.ENSMUSP00000065983,10090.ENSMUSP00000102995,10090.ENSMUSP00000128308	Col1a1,Thbs4,Col2a1,Col1a2,Pik3r1,Mapk1,Tnc,Thbs2
mmu04722	Neurotrophin signaling pathway	5	116	0.95	0.0023	10090.ENSMUSP00000000122,10090.ENSMUSP00000056774,10090.ENSMUSP00000065983,10090.ENSMUSP00000098333,10090.ENSMUSP00000102538	Ngfr,Pik3r1,Mapk1,Ptpn11,Ngf
mmu04611	Platelet activation	5	120	0.94	0.0026	10090.ENSMUSP00000001547,10090.ENSMUSP00000031668,10090.ENSMUSP00000056774,10090.ENSMUSP00000065983,10090.ENSMUSP00000085192	Col1a1,Col1a2,Pik3r1,Mapk1,Col3a1
mmu04960	Aldosterone-regulated sodium reabsorption	3	38	1.22	0.0073	10090.ENSMUSP00000056668,10090.ENSMUSP00000056774,10090.ENSMUSP00000065983	Igf1,Pik3r1,Mapk1
mmu05410	Hypertrophic cardiomyopathy	4	88	0.98	0.0073	10090.ENSMUSP00000002678,10090.ENSMUSP00000003687,10090.ENSMUSP00000043849,10090.ENSMUSP00000056668	Tgfb1,Tgfb3,Tgfb2,Igf1
mmu05414	Dilated cardiomyopathy	4	90	0.97	0.0077	10090.ENSMUSP00000002678,10090.ENSMUSP00000003687,10090.ENSMUSP00000043849,10090.ENSMUSP00000056668	Tgfb1,Tgfb3,Tgfb2,Igf1
mmu05206	MicroRNAs in cancer	5	158	0.82	0.0078	10090.ENSMUSP00000043849,10090.ENSMUSP00000056774,10090.ENSMUSP00000065983,10090.ENSMUSP00000095249,10090.ENSMUSP00000102995	Tgfb2,Pik3r1,Mapk1,Hdac4,Tnc
mmu05152	Tuberculosis	5	170	0.79	0.0105	10090.ENSMUSP00000000299,10090.ENSMUSP00000002678,10090.ENSMUSP00000003687,10090.ENSMUSP00000043849,10090.ENSMUSP00000065983	Itgb2,Tgfb1,Tgfb3,Tgfb2,Mapk1
mmu05145	Toxoplasmosis	4	106	0.89	0.0129	10090.ENSMUSP00000002678,10090.ENSMUSP00000003687,10090.ENSMUSP00000043849,10090.ENSMUSP00000065983	Tgfb1,Tgfb3,Tgfb2,Mapk1
mmu04650	Natural killer cell mediated cytotoxicity	4	113	0.87	0.0158	10090.ENSMUSP00000000299,10090.ENSMUSP00000056774,10090.ENSMUSP00000065983,10090.ENSMUSP00000098333	Itgb2,Pik3r1,Mapk1,Ptpn11
mmu04670	Leukocyte transendothelial migration	4	113	0.87	0.0158	10090.ENSMUSP00000000299,10090.ENSMUSP00000056774,10090.ENSMUSP00000072800,10090.ENSMUSP00000098333	Itgb2,Pik3r1,Cxcl12,Ptpn11
mmu05202	Transcriptional misregulation in cancer	5	192	0.73	0.0162	10090.ENSMUSP00000000122,10090.ENSMUSP00000056668,10090.ENSMUSP00000062333,10090.ENSMUSP00000079493,10090.ENSMUSP00000109202	Ngfr,Igf1,Tgfbr2,Eya1,Runx2
mmu05217	Basal cell carcinoma	3	63	1.0	0.0241	10090.ENSMUSP00000001812,10090.ENSMUSP00000026474,10090.ENSMUSP00000028836	Smo,Gli1,Bmp2
mmu05214	Glioma	3	70	0.95	0.0314	10090.ENSMUSP00000056668,10090.ENSMUSP00000056774,10090.ENSMUSP00000065983	Igf1,Pik3r1,Mapk1
mmu01521	EGFR tyrosine kinase inhibitor resistance	3	78	0.9	0.0411	10090.ENSMUSP00000056668,10090.ENSMUSP00000056774,10090.ENSMUSP00000065983	Igf1,Pik3r1,Mapk1
mmu04144	Endocytosis	5	249	0.62	0.0440	10090.ENSMUSP00000007757,10090.ENSMUSP00000034973,10090.ENSMUSP00000062333,10090.ENSMUSP00000090177,10090.ENSMUSP00000130115	Tgfbr1,Smad3,Tgfbr2,Smurf2,Smad2

## Sheet: mKEGG brite hierarchy
SUPPLEMENTARY FILE 10
#term ID	term description	PHYSIOLOGICAL (P) /DISEASE (D)	BRITE MACRO CATEGORY OF PHYSIOLOGICAL PATHS		TOTAL PHYSIOLOGICAL PATH COUNT FOR EACH BRITE MACRO CATEGORY	PHYSIOLOGICAL PATH NUMBER COLLECTED
mmu04350	TGF-beta signaling pathway	P	GROWTH, DIFFERENTIATION AND SURVIVAL		GROWTH, DIFFERENTIATION AND SURVIVAL	15
mmu04390	Hippo signaling pathway	P	GROWTH, DIFFERENTIATION AND SURVIVAL		MORPHOGENESIS AND CELL MOTILITY	6
mmu04068	FoxO signaling pathway	P	GROWTH, DIFFERENTIATION AND SURVIVAL		NERVOUS SYSTEM	2
mmu04151	PI3K-Akt signaling pathway	P	GROWTH, DIFFERENTIATION AND SURVIVAL		ENDOCRINE SYSTEM	2
mmu04926	Relaxin signaling pathway	P	ENDOCRINE SYSTEM
mmu04010	MAPK signaling pathway	P	GROWTH, DIFFERENTIATION AND SURVIVAL
mmu04015	Rap1 signaling pathway	P	MORPHOGENESIS AND CELL MOTILITY
mmu04218	Cellular senescence	P	MORPHOGENESIS AND CELL MOTILITY
mmu04550	Signaling pathways regulating pluripotency of stem cells	P	GROWTH, DIFFERENTIATION AND SURVIVAL
mmu04510	Focal adhesion	P	MORPHOGENESIS AND CELL MOTILITY
mmu04659	Th17 cell differentiation	P	GROWTH, DIFFERENTIATION AND SURVIVAL
mmu04014	Ras signaling pathway	P	GROWTH, DIFFERENTIATION AND SURVIVAL
mmu04371	Apelin signaling pathway	P	GROWTH, DIFFERENTIATION AND SURVIVAL
mmu04512	ECM-receptor interaction	P	MORPHOGENESIS AND CELL MOTILITY
mmu04060	Cytokine-cytokine receptor interaction	P	GROWTH, DIFFERENTIATION AND SURVIVAL
mmu04520	Adherens junction	P	MORPHOGENESIS AND CELL MOTILITY
mmu04110	Cell cycle	P	GROWTH, DIFFERENTIATION AND SURVIVAL
mmu04380	Osteoclast differentiation	P	GROWTH, DIFFERENTIATION AND SURVIVAL
mmu04810	Regulation of actin cytoskeleton	P	MORPHOGENESIS AND CELL MOTILITY
mmu04340	Hedgehog signaling pathway	P	GROWTH, DIFFERENTIATION AND SURVIVAL
mmu04360	Axon guidance	P	NERVOUS SYSTEM
mmu04722	Neurotrophin signaling pathway	P	NERVOUS SYSTEM
mmu04960	Aldosterone-regulated sodium reabsorption	P	ENDOCRINE SYSTEM
mmu01521	EGFR tyrosine kinase inhibitor resistance	P	GROWTH, DIFFERENTIATION AND SURVIVAL
mmu04144	Endocytosis	P	GROWTH, DIFFERENTIATION AND SURVIVAL
mmu04933	AGE-RAGE signaling pathway in diabetic complications	D	-
mmu05226	Gastric cancer	D	-
mmu05205	Proteoglycans in cancer	D	-
mmu05212	Pancreatic cancer	D	-
mmu05220	Chronic myeloid leukemia	D	-
mmu05210	Colorectal cancer	D	-
mmu05200	Pathways in cancer	D	-
mmu05166	Human T-cell leukemia virus 1 infection	D	-
mmu05225	Hepatocellular carcinoma	D	-
mmu05142	Chagas disease	D	-
mmu05146	Amoebiasis	D	-
mmu05161	Hepatitis B	D	-
mmu05144	Malaria	D	-
mmu05211	Renal cell carcinoma	D	-
mmu05218	Melanoma	D	-
mmu05321	Inflammatory bowel disease	D	-
mmu05140	Leishmaniasis	D	-
mmu05323	Rheumatoid arthritis	D	-
mmu05224	Breast cancer	D	-
mmu05165	Human papillomavirus infection	D	-
mmu04611	Platelet activation	D	-
mmu05410	Hypertrophic cardiomyopathy	D	-
mmu05414	Dilated cardiomyopathy	D	-
mmu05206	MicroRNAs in cancer	D	-
mmu05152	Tuberculosis	D	-
mmu05145	Toxoplasmosis	D	-
mmu04650	Natural killer cell mediated cytotoxicity	D	-
mmu04670	Leukocyte transendothelial migration	D	-
mmu05202	Transcriptional misregulation in cancer	D	-
mmu05217	Basal cell carcinoma	D	-
mmu05214	Glioma	D	-

## Sheet: rKEGG Enriched TendonNET
SUPPLEMENTARY FILE 10
#term ID	term description	observed gene count	background gene count	strength	false discovery rate	matching proteins in your network (IDs)	matching proteins in your network (labels)
rno04350	TGF-beta signaling pathway	9	92	1.75	3.69e-11	10116.ENSRNOP00000000206,10116.ENSRNOP00000002533,10116.ENSRNOP00000004382,10116.ENSRNOP00000006070,10116.ENSRNOP00000016704,10116.ENSRNOP00000025079,10116.ENSRNOP00000026627,10116.ENSRNOP00000028051,10116.ENSRNOP00000037011	Ep300,Mapk1,Fmod,Dcn,Smad5,Smad1,Mapk3,Tgfb1,Bmpr2
rno04380	Osteoclast differentiation	9	115	1.65	1.22e-10	10116.ENSRNOP00000002533,10116.ENSRNOP00000003987,10116.ENSRNOP00000026470,10116.ENSRNOP00000026627,10116.ENSRNOP00000027891,10116.ENSRNOP00000028051,10116.ENSRNOP00000060904,10116.ENSRNOP00000061729,10116.ENSRNOP00000065427	Mapk1,Mapk9,Jund,Mapk3,Fosl1,Tgfb1,Mapk8,Junb,Fosb
rno04510	Focal adhesion	10	186	1.49	1.31e-10	10116.ENSRNOP00000002533,10116.ENSRNOP00000002938,10116.ENSRNOP00000003987,10116.ENSRNOP00000005311,10116.ENSRNOP00000016044,10116.ENSRNOP00000026016,10116.ENSRNOP00000026627,10116.ENSRNOP00000060904,10116.ENSRNOP00000062358,10116.ENSRNOP00000066422	Mapk1,Ibsp,Mapk9,Col1a1,Col2a1,Ctnnb1,Mapk3,Mapk8,Spp1,Tnc
rno04151	PI3K-Akt signaling pathway	10	325	1.24	1.77e-08	10116.ENSRNOP00000002533,10116.ENSRNOP00000002938,10116.ENSRNOP00000005311,10116.ENSRNOP00000010171,10116.ENSRNOP00000010680,10116.ENSRNOP00000016044,10116.ENSRNOP00000026627,10116.ENSRNOP00000047840,10116.ENSRNOP00000062358,10116.ENSRNOP00000066422	Mapk1,Ibsp,Col1a1,Nr4a1,Prkaa2,Col2a1,Mapk3,Tp53,Spp1,Tnc
rno04657	IL-17 signaling pathway	7	86	1.67	1.77e-08	10116.ENSRNOP00000002533,10116.ENSRNOP00000003987,10116.ENSRNOP00000026470,10116.ENSRNOP00000026627,10116.ENSRNOP00000027891,10116.ENSRNOP00000060904,10116.ENSRNOP00000065427	Mapk1,Mapk9,Jund,Mapk3,Fosl1,Mapk8,Fosb
rno04933	AGE-RAGE signaling pathway in diabetic complications	7	93	1.63	1.77e-08	10116.ENSRNOP00000002533,10116.ENSRNOP00000003987,10116.ENSRNOP00000005311,10116.ENSRNOP00000026303,10116.ENSRNOP00000026627,10116.ENSRNOP00000028051,10116.ENSRNOP00000060904	Mapk1,Mapk9,Col1a1,Egr1,Mapk3,Tgfb1,Mapk8
rno05165	Human papillomavirus infection	10	327	1.24	1.77e-08	10116.ENSRNOP00000000206,10116.ENSRNOP00000002533,10116.ENSRNOP00000002938,10116.ENSRNOP00000005311,10116.ENSRNOP00000016044,10116.ENSRNOP00000026016,10116.ENSRNOP00000026627,10116.ENSRNOP00000047840,10116.ENSRNOP00000062358,10116.ENSRNOP00000066422	Ep300,Mapk1,Ibsp,Col1a1,Col2a1,Ctnnb1,Mapk3,Tp53,Spp1,Tnc
rno05166	Human T-cell leukemia virus 1 infection	9	226	1.36	1.77e-08	10116.ENSRNOP00000000206,10116.ENSRNOP00000002533,10116.ENSRNOP00000003987,10116.ENSRNOP00000026303,10116.ENSRNOP00000026627,10116.ENSRNOP00000027891,10116.ENSRNOP00000028051,10116.ENSRNOP00000047840,10116.ENSRNOP00000060904	Ep300,Mapk1,Mapk9,Egr1,Mapk3,Fosl1,Tgfb1,Tp53,Mapk8
rno05210	Colorectal cancer	7	84	1.68	1.77e-08	10116.ENSRNOP00000002533,10116.ENSRNOP00000003987,10116.ENSRNOP00000026016,10116.ENSRNOP00000026627,10116.ENSRNOP00000028051,10116.ENSRNOP00000047840,10116.ENSRNOP00000060904	Mapk1,Mapk9,Ctnnb1,Mapk3,Tgfb1,Tp53,Mapk8
rno04010	MAPK signaling pathway	9	284	1.26	5.00e-08	10116.ENSRNOP00000002533,10116.ENSRNOP00000003987,10116.ENSRNOP00000010171,10116.ENSRNOP00000026470,10116.ENSRNOP00000026627,10116.ENSRNOP00000028051,10116.ENSRNOP00000032969,10116.ENSRNOP00000047840,10116.ENSRNOP00000060904	Mapk1,Mapk9,Nr4a1,Jund,Mapk3,Tgfb1,Dusp6,Tp53,Mapk8
rno05167	Kaposi sarcoma-associated herpesvirus infection	8	190	1.38	5.00e-08	10116.ENSRNOP00000000206,10116.ENSRNOP00000002533,10116.ENSRNOP00000003987,10116.ENSRNOP00000026016,10116.ENSRNOP00000026627,10116.ENSRNOP00000042230,10116.ENSRNOP00000047840,10116.ENSRNOP00000060904	Ep300,Mapk1,Mapk9,Ctnnb1,Mapk3,Hif1a,Tp53,Mapk8
rno05205	Proteoglycans in cancer	8	187	1.39	5.00e-08	10116.ENSRNOP00000002533,10116.ENSRNOP00000005311,10116.ENSRNOP00000006070,10116.ENSRNOP00000026016,10116.ENSRNOP00000026627,10116.ENSRNOP00000028051,10116.ENSRNOP00000042230,10116.ENSRNOP00000047840	Mapk1,Col1a1,Dcn,Ctnnb1,Mapk3,Tgfb1,Hif1a,Tp53
rno04068	FoxO signaling pathway	7	123	1.51	6.77e-08	10116.ENSRNOP00000000206,10116.ENSRNOP00000002533,10116.ENSRNOP00000003987,10116.ENSRNOP00000010680,10116.ENSRNOP00000026627,10116.ENSRNOP00000028051,10116.ENSRNOP00000060904	Ep300,Mapk1,Mapk9,Prkaa2,Mapk3,Tgfb1,Mapk8
rno05212	Pancreatic cancer	6	72	1.68	1.09e-07	10116.ENSRNOP00000002533,10116.ENSRNOP00000003987,10116.ENSRNOP00000026627,10116.ENSRNOP00000028051,10116.ENSRNOP00000047840,10116.ENSRNOP00000060904	Mapk1,Mapk9,Mapk3,Tgfb1,Tp53,Mapk8
rno05161	Hepatitis B	7	146	1.44	1.83e-07	10116.ENSRNOP00000000206,10116.ENSRNOP00000002533,10116.ENSRNOP00000003987,10116.ENSRNOP00000026627,10116.ENSRNOP00000028051,10116.ENSRNOP00000047840,10116.ENSRNOP00000060904	Ep300,Mapk1,Mapk9,Mapk3,Tgfb1,Tp53,Mapk8
rno04659	Th17 cell differentiation	6	100	1.53	6.13e-07	10116.ENSRNOP00000002533,10116.ENSRNOP00000003987,10116.ENSRNOP00000026627,10116.ENSRNOP00000028051,10116.ENSRNOP00000042230,10116.ENSRNOP00000060904	Mapk1,Mapk9,Mapk3,Tgfb1,Hif1a,Mapk8
rno04919	Thyroid hormone signaling pathway	6	107	1.5	8.46e-07	10116.ENSRNOP00000000206,10116.ENSRNOP00000002533,10116.ENSRNOP00000026016,10116.ENSRNOP00000026627,10116.ENSRNOP00000042230,10116.ENSRNOP00000047840	Ep300,Mapk1,Ctnnb1,Mapk3,Hif1a,Tp53
rno04935	Growth hormone synthesis, secretion and action	6	108	1.5	8.46e-07	10116.ENSRNOP00000000206,10116.ENSRNOP00000002533,10116.ENSRNOP00000003987,10116.ENSRNOP00000026627,10116.ENSRNOP00000060904,10116.ENSRNOP00000061729	Ep300,Mapk1,Mapk9,Mapk3,Mapk8,Junb
rno04926	Relaxin signaling pathway	6	117	1.47	1.26e-06	10116.ENSRNOP00000002533,10116.ENSRNOP00000003987,10116.ENSRNOP00000005311,10116.ENSRNOP00000026627,10116.ENSRNOP00000028051,10116.ENSRNOP00000060904	Mapk1,Mapk9,Col1a1,Mapk3,Tgfb1,Mapk8
rno04140	Autophagy - animal	6	131	1.42	2.27e-06	10116.ENSRNOP00000002533,10116.ENSRNOP00000003987,10116.ENSRNOP00000010680,10116.ENSRNOP00000026627,10116.ENSRNOP00000042230,10116.ENSRNOP00000060904	Mapk1,Mapk9,Prkaa2,Mapk3,Hif1a,Mapk8
rno04550	Signaling pathways regulating pluripotency of stem cells	6	131	1.42	2.27e-06	10116.ENSRNOP00000002533,10116.ENSRNOP00000016704,10116.ENSRNOP00000025079,10116.ENSRNOP00000026016,10116.ENSRNOP00000026627,10116.ENSRNOP00000037011	Mapk1,Smad5,Smad1,Ctnnb1,Mapk3,Bmpr2
rno05211	Renal cell carcinoma	5	67	1.63	2.48e-06	10116.ENSRNOP00000000206,10116.ENSRNOP00000002533,10116.ENSRNOP00000026627,10116.ENSRNOP00000028051,10116.ENSRNOP00000042230	Ep300,Mapk1,Mapk3,Tgfb1,Hif1a
rno05418	Fluid shear stress and atherosclerosis	6	136	1.4	2.48e-06	10116.ENSRNOP00000003987,10116.ENSRNOP00000010680,10116.ENSRNOP00000026016,10116.ENSRNOP00000037011,10116.ENSRNOP00000047840,10116.ENSRNOP00000060904	Mapk9,Prkaa2,Ctnnb1,Bmpr2,Tp53,Mapk8
rno05200	Pathways in cancer	9	505	1.01	2.85e-06	10116.ENSRNOP00000000206,10116.ENSRNOP00000002533,10116.ENSRNOP00000003987,10116.ENSRNOP00000026016,10116.ENSRNOP00000026627,10116.ENSRNOP00000028051,10116.ENSRNOP00000042230,10116.ENSRNOP00000047840,10116.ENSRNOP00000060904	Ep300,Mapk1,Mapk9,Ctnnb1,Mapk3,Tgfb1,Hif1a,Tp53,Mapk8
rno04310	Wnt signaling pathway	6	143	1.38	2.99e-06	10116.ENSRNOP00000000206,10116.ENSRNOP00000003987,10116.ENSRNOP00000026016,10116.ENSRNOP00000027891,10116.ENSRNOP00000047840,10116.ENSRNOP00000060904	Ep300,Mapk9,Ctnnb1,Fosl1,Tp53,Mapk8
rno04512	ECM-receptor interaction	5	78	1.56	4.30e-06	10116.ENSRNOP00000002938,10116.ENSRNOP00000005311,10116.ENSRNOP00000016044,10116.ENSRNOP00000062358,10116.ENSRNOP00000066422	Ibsp,Col1a1,Col2a1,Spp1,Tnc
rno04912	GnRH signaling pathway	5	80	1.55	4.66e-06	10116.ENSRNOP00000002533,10116.ENSRNOP00000003987,10116.ENSRNOP00000026303,10116.ENSRNOP00000026627,10116.ENSRNOP00000060904	Mapk1,Mapk9,Egr1,Mapk3,Mapk8
rno05152	Tuberculosis	6	157	1.34	4.66e-06	10116.ENSRNOP00000000206,10116.ENSRNOP00000002533,10116.ENSRNOP00000003987,10116.ENSRNOP00000026627,10116.ENSRNOP00000028051,10116.ENSRNOP00000060904	Ep300,Mapk1,Mapk9,Mapk3,Tgfb1,Mapk8
rno05206	MicroRNAs in cancer	6	157	1.34	4.66e-06	10116.ENSRNOP00000000206,10116.ENSRNOP00000002533,10116.ENSRNOP00000026627,10116.ENSRNOP00000037011,10116.ENSRNOP00000047840,10116.ENSRNOP00000066422	Ep300,Mapk1,Mapk3,Bmpr2,Tp53,Tnc
rno04620	Toll-like receptor signaling pathway	5	87	1.51	6.24e-06	10116.ENSRNOP00000002533,10116.ENSRNOP00000003987,10116.ENSRNOP00000026627,10116.ENSRNOP00000060904,10116.ENSRNOP00000062358	Mapk1,Mapk9,Mapk3,Mapk8,Spp1
rno01522	Endocrine resistance	5	90	1.5	7.09e-06	10116.ENSRNOP00000002533,10116.ENSRNOP00000003987,10116.ENSRNOP00000026627,10116.ENSRNOP00000047840,10116.ENSRNOP00000060904	Mapk1,Mapk9,Mapk3,Tp53,Mapk8
rno05216	Thyroid cancer	4	36	1.8	7.23e-06	10116.ENSRNOP00000002533,10116.ENSRNOP00000026016,10116.ENSRNOP00000026627,10116.ENSRNOP00000047840	Mapk1,Ctnnb1,Mapk3,Tp53
rno05231	Choline metabolism in cancer	5	91	1.5	7.23e-06	10116.ENSRNOP00000002533,10116.ENSRNOP00000003987,10116.ENSRNOP00000026627,10116.ENSRNOP00000042230,10116.ENSRNOP00000060904	Mapk1,Mapk9,Mapk3,Hif1a,Mapk8
rno05215	Prostate cancer	5	96	1.47	8.76e-06	10116.ENSRNOP00000000206,10116.ENSRNOP00000002533,10116.ENSRNOP00000026016,10116.ENSRNOP00000026627,10116.ENSRNOP00000047840	Ep300,Mapk1,Ctnnb1,Mapk3,Tp53
rno05142	Chagas disease	5	98	1.46	9.39e-06	10116.ENSRNOP00000002533,10116.ENSRNOP00000003987,10116.ENSRNOP00000026627,10116.ENSRNOP00000028051,10116.ENSRNOP00000060904	Mapk1,Mapk9,Mapk3,Tgfb1,Mapk8
rno04928	Parathyroid hormone synthesis, secretion and action	5	100	1.45	1.00e-05	10116.ENSRNOP00000002533,10116.ENSRNOP00000026303,10116.ENSRNOP00000026470,10116.ENSRNOP00000026627,10116.ENSRNOP00000057733	Mapk1,Egr1,Jund,Mapk3,Runx2
rno05145	Toxoplasmosis	5	105	1.43	1.23e-05	10116.ENSRNOP00000002533,10116.ENSRNOP00000003987,10116.ENSRNOP00000026627,10116.ENSRNOP00000028051,10116.ENSRNOP00000060904	Mapk1,Mapk9,Mapk3,Tgfb1,Mapk8
rno04024	cAMP signaling pathway	6	200	1.23	1.31e-05	10116.ENSRNOP00000000206,10116.ENSRNOP00000002533,10116.ENSRNOP00000003511,10116.ENSRNOP00000003987,10116.ENSRNOP00000026627,10116.ENSRNOP00000060904	Ep300,Mapk1,Sox9,Mapk9,Mapk3,Mapk8
rno04668	TNF signaling pathway	5	107	1.42	1.31e-05	10116.ENSRNOP00000002533,10116.ENSRNOP00000003987,10116.ENSRNOP00000026627,10116.ENSRNOP00000060904,10116.ENSRNOP00000061729	Mapk1,Mapk9,Mapk3,Mapk8,Junb
rno04930	Type II diabetes mellitus	4	45	1.7	1.35e-05	10116.ENSRNOP00000002533,10116.ENSRNOP00000003987,10116.ENSRNOP00000026627,10116.ENSRNOP00000060904	Mapk1,Mapk9,Mapk3,Mapk8
rno04722	Neurotrophin signaling pathway	5	113	1.4	1.57e-05	10116.ENSRNOP00000002533,10116.ENSRNOP00000003987,10116.ENSRNOP00000026627,10116.ENSRNOP00000047840,10116.ENSRNOP00000060904	Mapk1,Mapk9,Mapk3,Tp53,Mapk8
rno04071	Sphingolipid signaling pathway	5	115	1.39	1.67e-05	10116.ENSRNOP00000002533,10116.ENSRNOP00000003987,10116.ENSRNOP00000026627,10116.ENSRNOP00000047840,10116.ENSRNOP00000060904	Mapk1,Mapk9,Mapk3,Tp53,Mapk8
rno04210	Apoptosis	5	121	1.37	2.07e-05	10116.ENSRNOP00000002533,10116.ENSRNOP00000003987,10116.ENSRNOP00000026627,10116.ENSRNOP00000047840,10116.ENSRNOP00000060904	Mapk1,Mapk9,Mapk3,Tp53,Mapk8
rno04910	Insulin signaling pathway	5	124	1.36	2.27e-05	10116.ENSRNOP00000002533,10116.ENSRNOP00000003987,10116.ENSRNOP00000010680,10116.ENSRNOP00000026627,10116.ENSRNOP00000060904	Mapk1,Mapk9,Prkaa2,Mapk3,Mapk8
rno04371	Apelin signaling pathway	5	127	1.35	2.49e-05	10116.ENSRNOP00000002533,10116.ENSRNOP00000010680,10116.ENSRNOP00000026303,10116.ENSRNOP00000026627,10116.ENSRNOP00000062358	Mapk1,Prkaa2,Egr1,Mapk3,Spp1
rno05213	Endometrial cancer	4	57	1.6	2.84e-05	10116.ENSRNOP00000002533,10116.ENSRNOP00000026016,10116.ENSRNOP00000026627,10116.ENSRNOP00000047840	Mapk1,Ctnnb1,Mapk3,Tp53
rno04137	Mitophagy - animal	4	61	1.57	3.59e-05	10116.ENSRNOP00000003987,10116.ENSRNOP00000042230,10116.ENSRNOP00000047840,10116.ENSRNOP00000060904	Mapk9,Hif1a,Tp53,Mapk8
rno05230	Central carbon metabolism in cancer	4	62	1.56	3.74e-05	10116.ENSRNOP00000002533,10116.ENSRNOP00000026627,10116.ENSRNOP00000042230,10116.ENSRNOP00000047840	Mapk1,Mapk3,Hif1a,Tp53
rno04664	Fc epsilon RI signaling pathway	4	63	1.56	3.89e-05	10116.ENSRNOP00000002533,10116.ENSRNOP00000003987,10116.ENSRNOP00000026627,10116.ENSRNOP00000060904	Mapk1,Mapk9,Mapk3,Mapk8
rno05226	Gastric cancer	5	144	1.3	4.05e-05	10116.ENSRNOP00000002533,10116.ENSRNOP00000026016,10116.ENSRNOP00000026627,10116.ENSRNOP00000028051,10116.ENSRNOP00000047840	Mapk1,Ctnnb1,Mapk3,Tgfb1,Tp53
rno04520	Adherens junction	4	65	1.54	4.21e-05	10116.ENSRNOP00000000206,10116.ENSRNOP00000002533,10116.ENSRNOP00000026016,10116.ENSRNOP00000026627	Ep300,Mapk1,Ctnnb1,Mapk3
rno05133	Pertussis	4	68	1.52	4.89e-05	10116.ENSRNOP00000002533,10116.ENSRNOP00000003987,10116.ENSRNOP00000026627,10116.ENSRNOP00000060904	Mapk1,Mapk9,Mapk3,Mapk8
rno04917	Prolactin signaling pathway	4	71	1.51	5.65e-05	10116.ENSRNOP00000002533,10116.ENSRNOP00000003987,10116.ENSRNOP00000026627,10116.ENSRNOP00000060904	Mapk1,Mapk9,Mapk3,Mapk8
rno05225	Hepatocellular carcinoma	5	166	1.23	7.32e-05	10116.ENSRNOP00000002533,10116.ENSRNOP00000026016,10116.ENSRNOP00000026627,10116.ENSRNOP00000028051,10116.ENSRNOP00000047840	Mapk1,Ctnnb1,Mapk3,Tgfb1,Tp53
rno05220	Chronic myeloid leukemia	4	77	1.47	7.39e-05	10116.ENSRNOP00000002533,10116.ENSRNOP00000026627,10116.ENSRNOP00000028051,10116.ENSRNOP00000047840	Mapk1,Mapk3,Tgfb1,Tp53
rno04012	ErbB signaling pathway	4	80	1.45	8.39e-05	10116.ENSRNOP00000002533,10116.ENSRNOP00000003987,10116.ENSRNOP00000026627,10116.ENSRNOP00000060904	Mapk1,Mapk9,Mapk3,Mapk8
rno04914	Progesterone-mediated oocyte maturation	4	84	1.43	9.91e-05	10116.ENSRNOP00000002533,10116.ENSRNOP00000003987,10116.ENSRNOP00000026627,10116.ENSRNOP00000060904	Mapk1,Mapk9,Mapk3,Mapk8
rno04658	Th1 and Th2 cell differentiation	4	87	1.42	0.00011	10116.ENSRNOP00000002533,10116.ENSRNOP00000003987,10116.ENSRNOP00000026627,10116.ENSRNOP00000060904	Mapk1,Mapk9,Mapk3,Mapk8
rno04916	Melanogenesis	4	87	1.42	0.00011	10116.ENSRNOP00000000206,10116.ENSRNOP00000002533,10116.ENSRNOP00000026016,10116.ENSRNOP00000026627	Ep300,Mapk1,Ctnnb1,Mapk3
rno04660	T cell receptor signaling pathway	4	98	1.37	0.00017	10116.ENSRNOP00000002533,10116.ENSRNOP00000003987,10116.ENSRNOP00000026627,10116.ENSRNOP00000060904	Mapk1,Mapk9,Mapk3,Mapk8
rno05132	Salmonella infection	5	203	1.15	0.00017	10116.ENSRNOP00000002533,10116.ENSRNOP00000003987,10116.ENSRNOP00000026016,10116.ENSRNOP00000026627,10116.ENSRNOP00000060904	Mapk1,Mapk9,Ctnnb1,Mapk3,Mapk8
rno04625	C-type lectin receptor signaling pathway	4	102	1.35	0.00019	10116.ENSRNOP00000002533,10116.ENSRNOP00000003987,10116.ENSRNOP00000026627,10116.ENSRNOP00000060904	Mapk1,Mapk9,Mapk3,Mapk8
rno04066	HIF-1 signaling pathway	4	106	1.33	0.00022	10116.ENSRNOP00000000206,10116.ENSRNOP00000002533,10116.ENSRNOP00000026627,10116.ENSRNOP00000042230	Ep300,Mapk1,Mapk3,Hif1a
rno05219	Bladder cancer	3	38	1.65	0.00026	10116.ENSRNOP00000002533,10116.ENSRNOP00000026627,10116.ENSRNOP00000047840	Mapk1,Mapk3,Tp53
rno05135	Yersinia infection	4	122	1.27	0.00036	10116.ENSRNOP00000002533,10116.ENSRNOP00000003987,10116.ENSRNOP00000026627,10116.ENSRNOP00000060904	Mapk1,Mapk9,Mapk3,Mapk8
rno05020	Prion disease	5	258	1.04	0.00047	10116.ENSRNOP00000002533,10116.ENSRNOP00000003987,10116.ENSRNOP00000026303,10116.ENSRNOP00000026627,10116.ENSRNOP00000060904	Mapk1,Mapk9,Egr1,Mapk3,Mapk8
rno04723	Retrograde endocannabinoid signaling	4	139	1.21	0.00056	10116.ENSRNOP00000002533,10116.ENSRNOP00000003987,10116.ENSRNOP00000026627,10116.ENSRNOP00000060904	Mapk1,Mapk9,Mapk3,Mapk8
rno05224	Breast cancer	4	143	1.2	0.00062	10116.ENSRNOP00000002533,10116.ENSRNOP00000026016,10116.ENSRNOP00000026627,10116.ENSRNOP00000047840	Mapk1,Ctnnb1,Mapk3,Tp53
rno04932	Non-alcoholic fatty liver disease	4	146	1.19	0.00066	10116.ENSRNOP00000003987,10116.ENSRNOP00000010680,10116.ENSRNOP00000028051,10116.ENSRNOP00000060904	Mapk9,Prkaa2,Tgfb1,Mapk8
rno05160	Hepatitis C	4	146	1.19	0.00066	10116.ENSRNOP00000002533,10116.ENSRNOP00000026016,10116.ENSRNOP00000026627,10116.ENSRNOP00000047840	Mapk1,Ctnnb1,Mapk3,Tp53
rno04390	Hippo signaling pathway	4	151	1.18	0.00071	10116.ENSRNOP00000025079,10116.ENSRNOP00000026016,10116.ENSRNOP00000028051,10116.ENSRNOP00000037011	Smad1,Ctnnb1,Tgfb1,Bmpr2
rno04720	Long-term potentiation	3	56	1.48	0.00071	10116.ENSRNOP00000000206,10116.ENSRNOP00000002533,10116.ENSRNOP00000026627	Ep300,Mapk1,Mapk3
rno04934	Cushing syndrome	4	150	1.18	0.00071	10116.ENSRNOP00000002533,10116.ENSRNOP00000010171,10116.ENSRNOP00000026016,10116.ENSRNOP00000026627	Mapk1,Nr4a1,Ctnnb1,Mapk3
rno04929	GnRH secretion	3	60	1.45	0.00083	10116.ENSRNOP00000002533,10116.ENSRNOP00000026627,10116.ENSRNOP00000062358	Mapk1,Mapk3,Spp1
rno04621	NOD-like receptor signaling pathway	4	162	1.15	0.00089	10116.ENSRNOP00000002533,10116.ENSRNOP00000003987,10116.ENSRNOP00000026627,10116.ENSRNOP00000060904	Mapk1,Mapk9,Mapk3,Mapk8
rno04218	Cellular senescence	4	169	1.13	0.0010	10116.ENSRNOP00000002533,10116.ENSRNOP00000026627,10116.ENSRNOP00000028051,10116.ENSRNOP00000047840	Mapk1,Mapk3,Tgfb1,Tp53
rno05221	Acute myeloid leukemia	3	66	1.41	0.0010	10116.ENSRNOP00000002533,10116.ENSRNOP00000026627,10116.ENSRNOP00000032969	Mapk1,Mapk3,Dusp6
rno05223	Non-small cell lung cancer	3	66	1.41	0.0010	10116.ENSRNOP00000002533,10116.ENSRNOP00000026627,10116.ENSRNOP00000047840	Mapk1,Mapk3,Tp53
rno04920	Adipocytokine signaling pathway	3	68	1.4	0.0011	10116.ENSRNOP00000003987,10116.ENSRNOP00000010680,10116.ENSRNOP00000060904	Mapk9,Prkaa2,Mapk8
rno05214	Glioma	3	67	1.41	0.0011	10116.ENSRNOP00000002533,10116.ENSRNOP00000026627,10116.ENSRNOP00000047840	Mapk1,Mapk3,Tp53
rno05140	Leishmaniasis	3	70	1.39	0.0012	10116.ENSRNOP00000002533,10116.ENSRNOP00000026627,10116.ENSRNOP00000028051	Mapk1,Mapk3,Tgfb1
rno05202	Transcriptional misregulation in cancer	4	177	1.11	0.0012	10116.ENSRNOP00000025079,10116.ENSRNOP00000032969,10116.ENSRNOP00000047840,10116.ENSRNOP00000057733	Smad1,Dusp6,Tp53,Runx2
rno05218	Melanoma	3	71	1.38	0.0012	10116.ENSRNOP00000002533,10116.ENSRNOP00000026627,10116.ENSRNOP00000047840	Mapk1,Mapk3,Tp53
rno01524	Platinum drug resistance	3	77	1.35	0.0015	10116.ENSRNOP00000002533,10116.ENSRNOP00000026627,10116.ENSRNOP00000047840	Mapk1,Mapk3,Tp53
rno05010	Alzheimer disease	5	349	0.91	0.0015	10116.ENSRNOP00000002533,10116.ENSRNOP00000003987,10116.ENSRNOP00000026016,10116.ENSRNOP00000026627,10116.ENSRNOP00000060904	Mapk1,Mapk9,Ctnnb1,Mapk3,Mapk8
rno05203	Viral carcinogenesis	4	196	1.06	0.0016	10116.ENSRNOP00000000206,10116.ENSRNOP00000002533,10116.ENSRNOP00000026627,10116.ENSRNOP00000047840	Ep300,Mapk1,Mapk3,Tp53
rno05170	Human immunodeficiency virus 1 infection	4	204	1.05	0.0018	10116.ENSRNOP00000002533,10116.ENSRNOP00000003987,10116.ENSRNOP00000026627,10116.ENSRNOP00000060904	Mapk1,Mapk9,Mapk3,Mapk8
rno05235	PD-L1 expression and PD-1 checkpoint pathway in cancer	3	84	1.31	0.0018	10116.ENSRNOP00000002533,10116.ENSRNOP00000026627,10116.ENSRNOP00000042230	Mapk1,Mapk3,Hif1a
rno04014	Ras signaling pathway	4	219	1.02	0.0023	10116.ENSRNOP00000002533,10116.ENSRNOP00000003987,10116.ENSRNOP00000026627,10116.ENSRNOP00000060904	Mapk1,Mapk9,Mapk3,Mapk8
rno05163	Human cytomegalovirus infection	4	220	1.01	0.0023	10116.ENSRNOP00000002533,10116.ENSRNOP00000026016,10116.ENSRNOP00000026627,10116.ENSRNOP00000047840	Mapk1,Ctnnb1,Mapk3,Tp53
rno04931	Insulin resistance	3	104	1.22	0.0032	10116.ENSRNOP00000003987,10116.ENSRNOP00000010680,10116.ENSRNOP00000060904	Mapk9,Prkaa2,Mapk8
rno04611	Platelet activation	3	117	1.16	0.0044	10116.ENSRNOP00000002533,10116.ENSRNOP00000005311,10116.ENSRNOP00000026627	Mapk1,Col1a1,Mapk3
rno04110	Cell cycle	3	120	1.15	0.0047	10116.ENSRNOP00000000206,10116.ENSRNOP00000028051,10116.ENSRNOP00000047840	Ep300,Tgfb1,Tp53
rno04215	Apoptosis - multiple species	2	30	1.58	0.0051	10116.ENSRNOP00000003987,10116.ENSRNOP00000060904	Mapk9,Mapk8
rno05016	Huntington disease	4	283	0.91	0.0055	10116.ENSRNOP00000000206,10116.ENSRNOP00000003987,10116.ENSRNOP00000047840,10116.ENSRNOP00000060904	Ep300,Mapk9,Tp53,Mapk8
rno05162	Measles	3	131	1.12	0.0058	10116.ENSRNOP00000003987,10116.ENSRNOP00000047840,10116.ENSRNOP00000060904	Mapk9,Tp53,Mapk8
rno05034	Alcoholism	3	135	1.1	0.0062	10116.ENSRNOP00000002533,10116.ENSRNOP00000026627,10116.ENSRNOP00000065427	Mapk1,Mapk3,Fosb
rno04921	Oxytocin signaling pathway	3	141	1.08	0.0070	10116.ENSRNOP00000002533,10116.ENSRNOP00000010680,10116.ENSRNOP00000026627	Mapk1,Prkaa2,Mapk3
rno04960	Aldosterone-regulated sodium reabsorption	2	37	1.49	0.0072	10116.ENSRNOP00000002533,10116.ENSRNOP00000026627	Mapk1,Mapk3
rno04530	Tight junction	3	148	1.06	0.0078	10116.ENSRNOP00000003987,10116.ENSRNOP00000010680,10116.ENSRNOP00000060904	Mapk9,Prkaa2,Mapk8
rno04150	mTOR signaling pathway	3	150	1.06	0.0080	10116.ENSRNOP00000002533,10116.ENSRNOP00000010680,10116.ENSRNOP00000026627	Mapk1,Prkaa2,Mapk3
rno05164	Influenza A	3	152	1.05	0.0082	10116.ENSRNOP00000000206,10116.ENSRNOP00000002533,10116.ENSRNOP00000026627	Ep300,Mapk1,Mapk3
rno04360	Axon guidance	3	170	1.0	0.0111	10116.ENSRNOP00000002533,10116.ENSRNOP00000026627,10116.ENSRNOP00000037011	Mapk1,Mapk3,Bmpr2
rno04370	VEGF signaling pathway	2	55	1.32	0.0144	10116.ENSRNOP00000002533,10116.ENSRNOP00000026627	Mapk1,Mapk3
rno04730	Long-term depression	2	56	1.31	0.0147	10116.ENSRNOP00000002533,10116.ENSRNOP00000026627	Mapk1,Mapk3
rno04622	RIG-I-like receptor signaling pathway	2	57	1.3	0.0151	10116.ENSRNOP00000003987,10116.ENSRNOP00000060904	Mapk9,Mapk8
rno05217	Basal cell carcinoma	2	60	1.28	0.0165	10116.ENSRNOP00000026016,10116.ENSRNOP00000047840	Ctnnb1,Tp53
rno04015	Rap1 signaling pathway	3	200	0.93	0.0166	10116.ENSRNOP00000002533,10116.ENSRNOP00000026016,10116.ENSRNOP00000026627	Mapk1,Ctnnb1,Mapk3
rno05169	Epstein-Barr virus infection	3	207	0.92	0.0180	10116.ENSRNOP00000003987,10116.ENSRNOP00000047840,10116.ENSRNOP00000060904	Mapk9,Tp53,Mapk8
rno04662	B cell receptor signaling pathway	2	71	1.2	0.0220	10116.ENSRNOP00000002533,10116.ENSRNOP00000026627	Mapk1,Mapk3
rno05012	Parkinson disease	3	229	0.87	0.0233	10116.ENSRNOP00000003987,10116.ENSRNOP00000047840,10116.ENSRNOP00000060904	Mapk9,Tp53,Mapk8
rno01521	EGFR tyrosine kinase inhibitor resistance	2	77	1.17	0.0252	10116.ENSRNOP00000002533,10116.ENSRNOP00000026627	Mapk1,Mapk3
rno04540	Gap junction	2	79	1.16	0.0262	10116.ENSRNOP00000002533,10116.ENSRNOP00000026627	Mapk1,Mapk3
rno05410	Hypertrophic cardiomyopathy	2	83	1.14	0.0285	10116.ENSRNOP00000010680,10116.ENSRNOP00000028051	Prkaa2,Tgfb1
rno04666	Fc gamma R-mediated phagocytosis	2	84	1.13	0.0288	10116.ENSRNOP00000002533,10116.ENSRNOP00000026627	Mapk1,Mapk3
rno04211	Longevity regulating pathway	2	87	1.12	0.0305	10116.ENSRNOP00000010680,10116.ENSRNOP00000047840	Prkaa2,Tp53
rno04713	Circadian entrainment	2	87	1.12	0.0305	10116.ENSRNOP00000002533,10116.ENSRNOP00000026627	Mapk1,Mapk3
rno04650	Natural killer cell mediated cytotoxicity	2	90	1.1	0.0320	10116.ENSRNOP00000002533,10116.ENSRNOP00000026627	Mapk1,Mapk3
rno04922	Glucagon signaling pathway	2	90	1.1	0.0320	10116.ENSRNOP00000000206,10116.ENSRNOP00000010680	Ep300,Prkaa2
rno05146	Amoebiasis	2	94	1.08	0.0341	10116.ENSRNOP00000005311,10116.ENSRNOP00000028051	Col1a1,Tgfb1
rno04750	Inflammatory mediator regulation of TRP channels	2	100	1.06	0.0377	10116.ENSRNOP00000003987,10116.ENSRNOP00000060904	Mapk9,Mapk8
rno04725	Cholinergic synapse	2	101	1.05	0.0380	10116.ENSRNOP00000002533,10116.ENSRNOP00000026627	Mapk1,Mapk3
rno04724	Glutamatergic synapse	2	104	1.04	0.0398	10116.ENSRNOP00000002533,10116.ENSRNOP00000026627	Mapk1,Mapk3
rno04114	Oocyte meiosis	2	108	1.02	0.0424	10116.ENSRNOP00000002533,10116.ENSRNOP00000026627	Mapk1,Mapk3
rno04726	Serotonergic synapse	2	114	1.0	0.0465	10116.ENSRNOP00000002533,10116.ENSRNOP00000026627	Mapk1,Mapk3
rno04728	Dopaminergic synapse	2	115	1.0	0.0469	10116.ENSRNOP00000003987,10116.ENSRNOP00000060904	Mapk9,Mapk8

## Sheet: rKEGG brite hierarchy
SUPPLEMENTARY FILE 10
#term ID	term description	PHYSIOLOGICAL (P) /DISEASE (D)	BRITE MACRO CATEGORY OF PHYSIOLOGICAL PATHS		TOTAL PHYSIOLOGICAL PATH COUNT FOR EACH BRITE MACRO CATEGORY	PHYSIOLOGICAL PATH NUMBER COLLECTED
rno04350	TGF-beta signaling pathway	P	GROWTH, DIFFERENTIATION AND SURVIVAL		GROWTH, DIFFERENTIATION AND SURVIVAL	29
rno04380	Osteoclast differentiation	P	GROWTH, DIFFERENTIATION AND SURVIVAL		MORPHOGENESIS AND CELL MOTILITY	9
rno04510	Focal adhesion	P	MORPHOGENESIS AND CELL MOTILITY		NERVOUS SYSTEM	10
rno04151	PI3K-Akt signaling pathway	P	GROWTH, DIFFERENTIATION AND SURVIVAL		ENDOCRINE SYSTEM	12
rno04010	MAPK signaling pathway	P	GROWTH, DIFFERENTIATION AND SURVIVAL
rno04068	FoxO signaling pathway	P	GROWTH, DIFFERENTIATION AND SURVIVAL
rno04659	Th17 cell differentiation	P	GROWTH, DIFFERENTIATION AND SURVIVAL
rno04919	Thyroid hormone signaling pathway	P	ENDOCRINE SYSTEM
rno04935	Growth hormone synthesis, secretion and action	P	ENDOCRINE SYSTEM
rno04926	Relaxin signaling pathway	P	ENDOCRINE SYSTEM
rno04140	Autophagy - animal	P	GROWTH, DIFFERENTIATION AND SURVIVAL
rno04550	Signaling pathways regulating pluripotency of stem cells	P	GROWTH, DIFFERENTIATION AND SURVIVAL
rno04310	Wnt signaling pathway	P	MORPHOGENESIS AND CELL MOTILITY
rno04512	ECM-receptor interaction	P	MORPHOGENESIS AND CELL MOTILITY
rno04912	GnRH signaling pathway	P	NERVOUS SYSTEM
rno01522	Endocrine resistance	P	ENDOCRINE SYSTEM
rno04928	Parathyroid hormone synthesis, secretion and action	P	ENDOCRINE SYSTEM
rno04024	cAMP signaling pathway	P	GROWTH, DIFFERENTIATION AND SURVIVAL
rno04722	Neurotrophin signaling pathway	P	NERVOUS SYSTEM
rno04071	Sphingolipid signaling pathway	P	GROWTH, DIFFERENTIATION AND SURVIVAL
rno04210	Apoptosis	P	GROWTH, DIFFERENTIATION AND SURVIVAL
rno04910	Insulin signaling pathway	P	GROWTH, DIFFERENTIATION AND SURVIVAL
rno04371	Apelin signaling pathway	P	GROWTH, DIFFERENTIATION AND SURVIVAL
rno04137	Mitophagy - animal	P	GROWTH, DIFFERENTIATION AND SURVIVAL
rno04520	Adherens junction	P	MORPHOGENESIS AND CELL MOTILITY
rno04917	Prolactin signaling pathway	P	ENDOCRINE SYSTEM
rno04012	ErbB signaling pathway	P	GROWTH, DIFFERENTIATION AND SURVIVAL
rno04914	Progesterone-mediated oocyte maturation	P	ENDOCRINE SYSTEM
rno04658	Th1 and Th2 cell differentiation	P	GROWTH, DIFFERENTIATION AND SURVIVAL
rno04916	Melanogenesis	P	GROWTH, DIFFERENTIATION AND SURVIVAL
rno04066	HIF-1 signaling pathway	P	GROWTH, DIFFERENTIATION AND SURVIVAL
rno04723	Retrograde endocannabinoid signaling	P	NERVOUS SYSTEM
rno04390	Hippo signaling pathway	P	GROWTH, DIFFERENTIATION AND SURVIVAL
rno04929	GnRH secretion	P	NERVOUS SYSTEM
rno04218	Cellular senescence	P	MORPHOGENESIS AND CELL MOTILITY
rno04920	Adipocytokine signaling pathway	P	GROWTH, DIFFERENTIATION AND SURVIVAL
rno04014	Ras signaling pathway	P	GROWTH, DIFFERENTIATION AND SURVIVAL
rno04110	Cell cycle	P	GROWTH, DIFFERENTIATION AND SURVIVAL
rno04215	Apoptosis - multiple species	P	GROWTH, DIFFERENTIATION AND SURVIVAL
rno04921	Oxytocin signaling pathway	P	ENDOCRINE SYSTEM
rno04960	Aldosterone-regulated sodium reabsorption	P	ENDOCRINE SYSTEM
rno04530	Tight junction	P	MORPHOGENESIS AND CELL MOTILITY
rno04150	mTOR signaling pathway	P	GROWTH, DIFFERENTIATION AND SURVIVAL
rno04360	Axon guidance	P	NERVOUS SYSTEM
rno04370	VEGF signaling pathway	P	GROWTH, DIFFERENTIATION AND SURVIVAL
rno04015	Rap1 signaling pathway	P	MORPHOGENESIS AND CELL MOTILITY
rno01521	EGFR tyrosine kinase inhibitor resistance	P	GROWTH, DIFFERENTIATION AND SURVIVAL
rno04540	Gap junction	P	MORPHOGENESIS AND CELL MOTILITY
rno04666	Fc gamma R-mediated phagocytosis	P	GROWTH, DIFFERENTIATION AND SURVIVAL
rno04211	Oocyte meiosis	P	GROWTH, DIFFERENTIATION AND SURVIVAL
rno04713	Circadian entrainment	P	ENDOCRINE SYSTEM
rno04922	Glucagon signaling pathway	P	ENDOCRINE SYSTEM
rno04725	Cholinergic synapse	P	NERVOUS SYSTEM
rno04724	Glutamatergic synapse	P	NERVOUS SYSTEM
rno04114	Oocyte meiosis	P	GROWTH, DIFFERENTIATION AND SURVIVAL
rno04726	Serotonergic synapse	P	NERVOUS SYSTEM
rno04728	Dopaminergic synapse	P	NERVOUS SYSTEM
rno04657	IL-17 signaling pathway	D	-
rno04933	AGE-RAGE signaling pathway in diabetic complications	D	-
rno05165	Human papillomavirus infection	D	-
rno05166	Human T-cell leukemia virus 1 infection	D	-
rno05210	Colorectal cancer	D	-
rno05167	Kaposi sarcoma-associated herpesvirus infection	D	-
rno05205	Proteoglycans in cancer	D	-
rno05212	Pancreatic cancer	D	-
rno05161	Hepatitis B	D	-
rno05211	Renal cell carcinoma	D	-
rno05418	Fluid shear stress and atherosclerosis	D	-
rno05200	Pathways in cancer	D	-
rno05152	Tuberculosis	D	-
rno05206	MicroRNAs in cancer	D	-
rno04620	Toll-like receptor signaling pathway	D	-
rno05216	Thyroid cancer	D	-
rno05231	Choline metabolism in cancer	D	-
rno05215	Prostate cancer	D	-
rno05142	Chagas disease	D	-
rno05145	Toxoplasmosis	D	-
rno04668	TNF signaling pathway	D	-
rno04930	Type II diabetes mellitus	D	-
rno05213	Endometrial cancer	D	-
rno05230	Central carbon metabolism in cancer	D	-
rno04664	Fc epsilon RI signaling pathway	D	-
rno05226	Gastric cancer	D	-
rno05133	Pertussis	D	-
rno05225	Hepatocellular carcinoma	D	-
rno05220	Chronic myeloid leukemia	D	-
rno04660	T cell receptor signaling pathway	D	-
rno05132	Salmonella infection	D	-
rno04625	C-type lectin receptor signaling pathway	D	-
rno05219	Bladder cancer	D	-
rno05135	Yersinia infection	D	-
rno05020	Prion disease	D	-
rno05224	Breast cancer	D	-
rno04932	Non-alcoholic fatty liver disease	D	-
rno05160	Hepatitis C	D	-
rno04720	Long-term potentiation	D	-
rno04934	Cushing syndrome	D	-
rno04621	NOD-like receptor signaling pathway	D	-
rno05221	Acute myeloid leukemia	D	-
rno05223	Non-small cell lung cancer	D	-
rno05214	Glioma	D	-
rno05140	Leishmaniasis	D	-
rno05202	Transcriptional misregulation in cancer	D	-
rno05218	Melanoma	D	-
rno01524	Platinum drug resistance	D	-
rno05010	Alzheimer disease	D	-
rno05203	Viral carcinogenesis	D	-
rno05170	Human immunodeficiency virus 1 infection	D	-
rno05235	PD-L1 expression and PD-1 checkpoint pathway in cancer	D	-
rno05163	Human cytomegalovirus infection	D	-
rno04931	Insulin resistance	D	-
rno04611	Platelet activation	D	-
rno05016	Huntington disease	D	-
rno05162	Measles	D	-
rno05034	Alcoholism	D	-
rno05164	Influenza A	D	-
rno04730	Long-term depression	D	-
rno04622	RIG-I-like receptor signaling pathway	D	-
rno05217	Basal cell carcinoma	D	-
rno05169	Epstein-Barr virus infection	D	-
rno04662	B cell receptor signaling pathway	D	-
rno05012	Parkinson disease	D	-
rno05410	Hypertrophic cardiomyopathy	D	-
rno04650	Natural killer cell mediated cytotoxicity	D	-
rno05146	Amoebiasis	D	-
rno04750	Inflammatory mediator regulation of TRP channels	D	-

## Sheet: hKEGG  Enriched TendonNET
SUPPLEMENTARY FILE 10
#term ID	term description	observed gene count	background gene count	strength	false discovery rate	matching proteins in your network (IDs)	matching proteins in your network (labels)
hsa04350	TGF-beta signaling pathway	17	91	2.1	1.76e-29	9606.ENSP00000221930,9606.ENSP00000238682,9606.ENSP00000241416,9606.ENSP00000245451,9606.ENSP00000262158,9606.ENSP00000262160,9606.ENSP00000263640,9606.ENSP00000283147,9606.ENSP00000328181,9606.ENSP00000332973,9606.ENSP00000347041,9606.ENSP00000351905,9606.ENSP00000361107,9606.ENSP00000363708,9606.ENSP00000364133,9606.ENSP00000379204,9606.ENSP00000401907	TGFB1,TGFB3,ACVR2A,BMP4,SMAD7,SMAD2,ACVR1,BMP6,NOG,SMAD3,FMOD,TGFBR2,BMPR1A,BMPR2,TGFBR1,BMP7,BMPR1B
hsa04390	Hippo signaling pathway	13	153	1.76	7.28e-18	9606.ENSP00000221930,9606.ENSP00000238682,9606.ENSP00000245451,9606.ENSP00000262158,9606.ENSP00000262160,9606.ENSP00000283147,9606.ENSP00000332973,9606.ENSP00000351905,9606.ENSP00000361107,9606.ENSP00000363708,9606.ENSP00000364133,9606.ENSP00000379204,9606.ENSP00000401907	TGFB1,TGFB3,BMP4,SMAD7,SMAD2,BMP6,SMAD3,TGFBR2,BMPR1A,BMPR2,TGFBR1,BMP7,BMPR1B
hsa04060	Cytokine-cytokine receptor interaction	12	282	1.46	4.82e-13	9606.ENSP00000221930,9606.ENSP00000238682,9606.ENSP00000241416,9606.ENSP00000245451,9606.ENSP00000263640,9606.ENSP00000283147,9606.ENSP00000351905,9606.ENSP00000361107,9606.ENSP00000363708,9606.ENSP00000364133,9606.ENSP00000379204,9606.ENSP00000401907	TGFB1,TGFB3,ACVR2A,BMP4,ACVR1,BMP6,TGFBR2,BMPR1A,BMPR2,TGFBR1,BMP7,BMPR1B
hsa04550	Signaling pathways regulating pluripotency of stem cells	10	140	1.68	7.58e-13	9606.ENSP00000241416,9606.ENSP00000245451,9606.ENSP00000262160,9606.ENSP00000263640,9606.ENSP00000264498,9606.ENSP00000332973,9606.ENSP00000361107,9606.ENSP00000363708,9606.ENSP00000393312,9606.ENSP00000401907	ACVR2A,BMP4,SMAD2,ACVR1,FGF2,SMAD3,BMPR1A,BMPR2,FGFR1,BMPR1B
hsa05226	Gastric cancer	9	144	1.62	5.01e-11	9606.ENSP00000221930,9606.ENSP00000237837,9606.ENSP00000238682,9606.ENSP00000262160,9606.ENSP00000264498,9606.ENSP00000321797,9606.ENSP00000332973,9606.ENSP00000351905,9606.ENSP00000364133	TGFB1,FGF23,TGFB3,SMAD2,FGF2,FGF8,SMAD3,TGFBR2,TGFBR1
hsa04933	AGE-RAGE signaling pathway in diabetic complications	8	98	1.74	1.23e-10	9606.ENSP00000221930,9606.ENSP00000225964,9606.ENSP00000238682,9606.ENSP00000244007,9606.ENSP00000262160,9606.ENSP00000332973,9606.ENSP00000351905,9606.ENSP00000364133	TGFB1,COL1A1,TGFB3,PLCG1,SMAD2,SMAD3,TGFBR2,TGFBR1
hsa05200	Pathways in cancer	12	517	1.19	2.17e-10	9606.ENSP00000221930,9606.ENSP00000237837,9606.ENSP00000238682,9606.ENSP00000244007,9606.ENSP00000245451,9606.ENSP00000262160,9606.ENSP00000264498,9606.ENSP00000321797,9606.ENSP00000332973,9606.ENSP00000351905,9606.ENSP00000364133,9606.ENSP00000393312	TGFB1,FGF23,TGFB3,PLCG1,BMP4,SMAD2,FGF2,FGF8,SMAD3,TGFBR2,TGFBR1,FGFR1
hsa05212	Pancreatic cancer	6	73	1.74	6.56e-08	9606.ENSP00000221930,9606.ENSP00000238682,9606.ENSP00000262160,9606.ENSP00000332973,9606.ENSP00000351905,9606.ENSP00000364133	TGFB1,TGFB3,SMAD2,SMAD3,TGFBR2,TGFBR1
hsa05210	Colorectal cancer	6	82	1.69	1.13e-07	9606.ENSP00000221930,9606.ENSP00000238682,9606.ENSP00000262160,9606.ENSP00000332973,9606.ENSP00000351905,9606.ENSP00000364133	TGFB1,TGFB3,SMAD2,SMAD3,TGFBR2,TGFBR1
hsa05225	Hepatocellular carcinoma	7	160	1.47	1.29e-07	9606.ENSP00000221930,9606.ENSP00000238682,9606.ENSP00000244007,9606.ENSP00000262160,9606.ENSP00000332973,9606.ENSP00000351905,9606.ENSP00000364133	TGFB1,TGFB3,PLCG1,SMAD2,SMAD3,TGFBR2,TGFBR1
hsa04010	MAPK signaling pathway	8	288	1.27	2.46e-07	9606.ENSP00000221930,9606.ENSP00000237837,9606.ENSP00000238682,9606.ENSP00000264498,9606.ENSP00000321797,9606.ENSP00000351905,9606.ENSP00000364133,9606.ENSP00000393312	TGFB1,FGF23,TGFB3,FGF2,FGF8,TGFBR2,TGFBR1,FGFR1
hsa04659	Th17 cell differentiation	6	101	1.6	2.76e-07	9606.ENSP00000221930,9606.ENSP00000244007,9606.ENSP00000262160,9606.ENSP00000332973,9606.ENSP00000351905,9606.ENSP00000364133	TGFB1,PLCG1,SMAD2,SMAD3,TGFBR2,TGFBR1
hsa05418	Fluid shear stress and atherosclerosis	6	130	1.49	1.08e-06	9606.ENSP00000241416,9606.ENSP00000245451,9606.ENSP00000263640,9606.ENSP00000361107,9606.ENSP00000363708,9606.ENSP00000401907	ACVR2A,BMP4,ACVR1,BMPR1A,BMPR2,BMPR1B
hsa04218	Cellular senescence	6	150	1.43	2.27e-06	9606.ENSP00000221930,9606.ENSP00000238682,9606.ENSP00000262160,9606.ENSP00000332973,9606.ENSP00000351905,9606.ENSP00000364133	TGFB1,TGFB3,SMAD2,SMAD3,TGFBR2,TGFBR1
hsa05220	Chronic myeloid leukemia	5	75	1.65	2.46e-06	9606.ENSP00000221930,9606.ENSP00000238682,9606.ENSP00000332973,9606.ENSP00000351905,9606.ENSP00000364133	TGFB1,TGFB3,SMAD3,TGFBR2,TGFBR1
hsa05142	Chagas disease	5	99	1.53	8.61e-06	9606.ENSP00000221930,9606.ENSP00000238682,9606.ENSP00000262160,9606.ENSP00000351905,9606.ENSP00000364133	TGFB1,TGFB3,SMAD2,TGFBR2,TGFBR1
hsa05205	Proteoglycans in cancer	6	196	1.31	8.61e-06	9606.ENSP00000221930,9606.ENSP00000225964,9606.ENSP00000244007,9606.ENSP00000262160,9606.ENSP00000264498,9606.ENSP00000393312	TGFB1,COL1A1,PLCG1,SMAD2,FGF2,FGFR1
hsa05166	Human T-cell leukemia virus 1 infection	6	211	1.28	1.23e-05	9606.ENSP00000221930,9606.ENSP00000238682,9606.ENSP00000262160,9606.ENSP00000332973,9606.ENSP00000351905,9606.ENSP00000364133	TGFB1,TGFB3,SMAD2,SMAD3,TGFBR2,TGFBR1
hsa04068	FoxO signaling pathway	5	127	1.42	2.37e-05	9606.ENSP00000221930,9606.ENSP00000238682,9606.ENSP00000332973,9606.ENSP00000351905,9606.ENSP00000364133	TGFB1,TGFB3,SMAD3,TGFBR2,TGFBR1
hsa04926	Relaxin signaling pathway	5	128	1.42	2.37e-05	9606.ENSP00000221930,9606.ENSP00000225964,9606.ENSP00000262160,9606.ENSP00000351905,9606.ENSP00000364133	TGFB1,COL1A1,SMAD2,TGFBR2,TGFBR1
hsa05321	Inflammatory bowel disease	4	60	1.65	3.70e-05	9606.ENSP00000221930,9606.ENSP00000238682,9606.ENSP00000262160,9606.ENSP00000332973	TGFB1,TGFB3,SMAD2,SMAD3
hsa04520	Adherens junction	4	67	1.61	5.36e-05	9606.ENSP00000332973,9606.ENSP00000351905,9606.ENSP00000364133,9606.ENSP00000393312	SMAD3,TGFBR2,TGFBR1,FGFR1
hsa05161	Hepatitis B	5	159	1.33	5.70e-05	9606.ENSP00000221930,9606.ENSP00000238682,9606.ENSP00000332973,9606.ENSP00000351905,9606.ENSP00000364133	TGFB1,TGFB3,SMAD3,TGFBR2,TGFBR1
hsa05218	Melanoma	4	72	1.57	6.45e-05	9606.ENSP00000237837,9606.ENSP00000264498,9606.ENSP00000321797,9606.ENSP00000393312	FGF23,FGF2,FGF8,FGFR1
hsa04151	PI3K-Akt signaling pathway	6	350	1.06	0.00015	9606.ENSP00000225964,9606.ENSP00000237837,9606.ENSP00000264498,9606.ENSP00000321797,9606.ENSP00000369889,9606.ENSP00000393312	COL1A1,FGF23,FGF2,FGF8,COL2A1,FGFR1
hsa04015	Rap1 signaling pathway	5	202	1.22	0.00016	9606.ENSP00000237837,9606.ENSP00000244007,9606.ENSP00000264498,9606.ENSP00000321797,9606.ENSP00000393312	FGF23,PLCG1,FGF2,FGF8,FGFR1
hsa04014	Ras signaling pathway	5	226	1.17	0.00026	9606.ENSP00000237837,9606.ENSP00000244007,9606.ENSP00000264498,9606.ENSP00000321797,9606.ENSP00000393312	FGF23,PLCG1,FGF2,FGF8,FGFR1
hsa04110	Cell cycle	4	120	1.35	0.00039	9606.ENSP00000221930,9606.ENSP00000238682,9606.ENSP00000262160,9606.ENSP00000332973	TGFB1,TGFB3,SMAD2,SMAD3
hsa05224	Breast cancer	4	145	1.27	0.00076	9606.ENSP00000237837,9606.ENSP00000264498,9606.ENSP00000321797,9606.ENSP00000393312	FGF23,FGF2,FGF8,FGFR1
hsa04360	Axon guidance	4	177	1.18	0.0016	9606.ENSP00000244007,9606.ENSP00000363708,9606.ENSP00000379204,9606.ENSP00000401907	PLCG1,BMPR2,BMP7,BMPR1B
hsa04810	Regulation of actin cytoskeleton	4	209	1.11	0.0028	9606.ENSP00000237837,9606.ENSP00000264498,9606.ENSP00000321797,9606.ENSP00000393312	FGF23,FGF2,FGF8,FGFR1
hsa04144	Endocytosis	4	241	1.05	0.0047	9606.ENSP00000262160,9606.ENSP00000332973,9606.ENSP00000351905,9606.ENSP00000364133	SMAD2,SMAD3,TGFBR2,TGFBR1
hsa05146	Amoebiasis	3	100	1.31	0.0048	9606.ENSP00000221930,9606.ENSP00000225964,9606.ENSP00000238682	TGFB1,COL1A1,TGFB3
hsa04380	Osteoclast differentiation	3	122	1.22	0.0081	9606.ENSP00000221930,9606.ENSP00000351905,9606.ENSP00000364133	TGFB1,TGFBR2,TGFBR1
hsa04371	Apelin signaling pathway	3	131	1.19	0.0096	9606.ENSP00000262160,9606.ENSP00000332973,9606.ENSP00000364133	SMAD2,SMAD3,TGFBR1
hsa05144	Malaria	2	46	1.47	0.0213	9606.ENSP00000221930,9606.ENSP00000238682	TGFB1,TGFB3
hsa05211	Renal cell carcinoma	2	66	1.31	0.0412	9606.ENSP00000221930,9606.ENSP00000238682	TGFB1,TGFB3
hsa05140	Leishmaniasis	2	70	1.29	0.0448	9606.ENSP00000221930,9606.ENSP00000238682	TGFB1,TGFB3

## Sheet: hKEGG brite category
SUPPLEMENTARY FILE 10
#term ID	term description	PHYSIOLOGICAL (P) /DISEASE (D)	BRITE MACRO CATEGORY OF PHYSIOLOGICAL PATHS			TOTAL PHYSIOLOGICAL PATH COUNT FOR EACH BRITE MACRO CATEGORY	PHYSIOLOGICAL PATH NUMBER COLLECTED
hsa04350	TGF-beta signaling pathway	P	GROWTH, DIFFERENTIATION AND SURVIVAL			GROWTH, DIFFERENTIATION AND SURVIVAL	13
hsa04390	Hippo signaling pathway	P	GROWTH, DIFFERENTIATION AND SURVIVAL			MORPHOGENESIS AND CELL MOTILITY	4
hsa04060	Cytokine-cytokine receptor interaction	P	GROWTH, DIFFERENTIATION AND SURVIVAL			NERVOUS SYSTEM	1
hsa04550	Signaling pathways regulating pluripotency of stem cells	P	GROWTH, DIFFERENTIATION AND SURVIVAL			ENDOCRINE SYSTEM	1
hsa04010	MAPK signaling pathway	P	GROWTH, DIFFERENTIATION AND SURVIVAL
hsa04659	Th17 cell differentiation	P	GROWTH, DIFFERENTIATION AND SURVIVAL
hsa04218	Cellular senescence	P	MORPHOGENESIS AND CELL MOTILITY
hsa04068	FoxO signaling pathway	P	GROWTH, DIFFERENTIATION AND SURVIVAL
hsa04926	Relaxin signaling pathway	P	ENDOCRINE SYSTEM
hsa04520	Adherens junction	P	MORPHOGENESIS AND CELL MOTILITY
hsa04151	PI3K-Akt signaling pathway	P	GROWTH, DIFFERENTIATION AND SURVIVAL
hsa04015	Rap1 signaling pathway	P	MORPHOGENESIS AND CELL MOTILITY
hsa04014	Ras signaling pathway	P	GROWTH, DIFFERENTIATION AND SURVIVAL
hsa04110	Cell cycle	P	GROWTH, DIFFERENTIATION AND SURVIVAL
hsa04360	Axon guidance	P	NERVOUS SYSTEM
hsa04810	Regulation of actin cytoskeleton	P	MORPHOGENESIS AND CELL MOTILITY
hsa04144	Endocytosis	P	GROWTH, DIFFERENTIATION AND SURVIVAL
hsa04380	Osteoclast differentiation	P	GROWTH, DIFFERENTIATION AND SURVIVAL
hsa04371	Apelin signaling pathway	P	GROWTH, DIFFERENTIATION AND SURVIVAL
hsa05226	Gastric cancer	D	-
hsa04933	AGE-RAGE signaling pathway in diabetic complications	D	-
hsa05200	Pathways in cancer	D	-
hsa05212	Pancreatic cancer	D	-
hsa05210	Colorectal cancer	D	-
hsa05225	Hepatocellular carcinoma	D	-
hsa05418	Fluid shear stress and atherosclerosis	D	-
hsa05220	Chronic myeloid leukemia	D	-
hsa05142	Chagas disease	D	-
hsa05205	Proteoglycans in cancer	D	-
hsa05166	Human T-cell leukemia virus 1 infection	D	-
hsa05321	Inflammatory bowel disease	D	-
hsa05161	Hepatitis B	D	-
hsa05218	Melanoma	D	-
hsa05224	Breast cancer	D	-
hsa05146	Amoebiasis	D	-
hsa05144	Malaria	D	-
hsa05211	Renal cell carcinoma	D	-
hsa05140	Leishmaniasis	D	-

## Sheet: eKEGG Enriched TendonNET
SUPPLEMENTARY FILE 10
#term ID	term description	observed gene count	background gene count	strength	false discovery rate	matching proteins in your network (IDs)	matching proteins in your network (labels)
ecb05220	Chronic myeloid leukemia	7	86	1.89	1.53e-09	9796.ENSECAP00000004201,9796.ENSECAP00000009480,9796.ENSECAP00000013026,9796.ENSECAP00000025183,9796.ENSECAP00000032224,9796.ENSECAP00000046228,9796.ENSECAP00000051244	SHC1,TGFB1,TGFBR2,SMAD4,TGFB3,TGFBR1,TGFB2
ecb04350	TGF-beta signaling pathway	7	103	1.81	2.55e-09	9796.ENSECAP00000009480,9796.ENSECAP00000013026,9796.ENSECAP00000018077,9796.ENSECAP00000025183,9796.ENSECAP00000032224,9796.ENSECAP00000046228,9796.ENSECAP00000051244	TGFB1,TGFBR2,SMAD7,SMAD4,TGFB3,TGFBR1,TGFB2
ecb04933	AGE-RAGE signaling pathway in diabetic complications	7	105	1.8	2.55e-09	9796.ENSECAP00000009480,9796.ENSECAP00000013026,9796.ENSECAP00000025183,9796.ENSECAP00000027608,9796.ENSECAP00000032224,9796.ENSECAP00000046228,9796.ENSECAP00000051244	TGFB1,TGFBR2,SMAD4,MMP2,TGFB3,TGFBR1,TGFB2
ecb04926	Relaxin signaling pathway	7	135	1.69	7.80e-09	9796.ENSECAP00000004201,9796.ENSECAP00000005084,9796.ENSECAP00000009480,9796.ENSECAP00000013026,9796.ENSECAP00000018911,9796.ENSECAP00000027608,9796.ENSECAP00000046228	SHC1,MMP13,TGFB1,TGFBR2,MMP1,MMP2,TGFBR1
ecb04390	Hippo signaling pathway	7	157	1.63	1.72e-08	9796.ENSECAP00000009480,9796.ENSECAP00000013026,9796.ENSECAP00000018077,9796.ENSECAP00000025183,9796.ENSECAP00000032224,9796.ENSECAP00000046228,9796.ENSECAP00000051244	TGFB1,TGFBR2,SMAD7,SMAD4,TGFB3,TGFBR1,TGFB2
ecb05226	Gastric cancer	7	159	1.62	1.72e-08	9796.ENSECAP00000004201,9796.ENSECAP00000009480,9796.ENSECAP00000013026,9796.ENSECAP00000025183,9796.ENSECAP00000032224,9796.ENSECAP00000046228,9796.ENSECAP00000051244	SHC1,TGFB1,TGFBR2,SMAD4,TGFB3,TGFBR1,TGFB2
ecb05225	Hepatocellular carcinoma	7	168	1.6	1.94e-08	9796.ENSECAP00000004201,9796.ENSECAP00000009480,9796.ENSECAP00000013026,9796.ENSECAP00000025183,9796.ENSECAP00000032224,9796.ENSECAP00000046228,9796.ENSECAP00000051244	SHC1,TGFB1,TGFBR2,SMAD4,TGFB3,TGFBR1,TGFB2
ecb05212	Pancreatic cancer	6	96	1.77	3.53e-08	9796.ENSECAP00000009480,9796.ENSECAP00000013026,9796.ENSECAP00000025183,9796.ENSECAP00000032224,9796.ENSECAP00000046228,9796.ENSECAP00000051244	TGFB1,TGFBR2,SMAD4,TGFB3,TGFBR1,TGFB2
ecb05210	Colorectal cancer	6	108	1.72	6.17e-08	9796.ENSECAP00000009480,9796.ENSECAP00000013026,9796.ENSECAP00000025183,9796.ENSECAP00000032224,9796.ENSECAP00000046228,9796.ENSECAP00000051244	TGFB1,TGFBR2,SMAD4,TGFB3,TGFBR1,TGFB2
ecb04068	FoxO signaling pathway	6	152	1.57	3.97e-07	9796.ENSECAP00000009480,9796.ENSECAP00000013026,9796.ENSECAP00000025183,9796.ENSECAP00000032224,9796.ENSECAP00000046228,9796.ENSECAP00000051244	TGFB1,TGFBR2,SMAD4,TGFB3,TGFBR1,TGFB2
ecb05161	Hepatitis B	6	171	1.52	7.12e-07	9796.ENSECAP00000009480,9796.ENSECAP00000013026,9796.ENSECAP00000025183,9796.ENSECAP00000032224,9796.ENSECAP00000046228,9796.ENSECAP00000051244	TGFB1,TGFBR2,SMAD4,TGFB3,TGFBR1,TGFB2
ecb05323	Rheumatoid arthritis	6	183	1.49	9.65e-07	9796.ENSECAP00000001652,9796.ENSECAP00000009480,9796.ENSECAP00000014214,9796.ENSECAP00000018911,9796.ENSECAP00000032224,9796.ENSECAP00000051244	MMP3,TGFB1,TNFSF11,MMP1,TGFB3,TGFB2
ecb05200	Pathways in cancer	8	552	1.14	1.54e-06	9796.ENSECAP00000009480,9796.ENSECAP00000013026,9796.ENSECAP00000018911,9796.ENSECAP00000025183,9796.ENSECAP00000027608,9796.ENSECAP00000032224,9796.ENSECAP00000046228,9796.ENSECAP00000051244	TGFB1,TGFBR2,MMP1,SMAD4,MMP2,TGFB3,TGFBR1,TGFB2
ecb04380	Osteoclast differentiation	5	133	1.55	6.96e-06	9796.ENSECAP00000009480,9796.ENSECAP00000013026,9796.ENSECAP00000014214,9796.ENSECAP00000046228,9796.ENSECAP00000051244	TGFB1,TGFBR2,TNFSF11,TGFBR1,TGFB2
ecb04060	Cytokine-cytokine receptor interaction	6	297	1.28	1.25e-05	9796.ENSECAP00000009480,9796.ENSECAP00000013026,9796.ENSECAP00000014214,9796.ENSECAP00000032224,9796.ENSECAP00000046228,9796.ENSECAP00000051244	TGFB1,TGFBR2,TNFSF11,TGFB3,TGFBR1,TGFB2
ecb05166	Human T-cell leukemia virus 1 infection	6	299	1.28	1.25e-05	9796.ENSECAP00000009480,9796.ENSECAP00000013026,9796.ENSECAP00000025183,9796.ENSECAP00000032224,9796.ENSECAP00000046228,9796.ENSECAP00000051244	TGFB1,TGFBR2,SMAD4,TGFB3,TGFBR1,TGFB2
ecb04218	Cellular senescence	5	173	1.44	2.03e-05	9796.ENSECAP00000009480,9796.ENSECAP00000013026,9796.ENSECAP00000032224,9796.ENSECAP00000046228,9796.ENSECAP00000051244	TGFB1,TGFBR2,TGFB3,TGFBR1,TGFB2
ecb05142	Chagas disease	5	204	1.37	4.22e-05	9796.ENSECAP00000009480,9796.ENSECAP00000013026,9796.ENSECAP00000032224,9796.ENSECAP00000046228,9796.ENSECAP00000051244	TGFB1,TGFBR2,TGFB3,TGFBR1,TGFB2
ecb05205	Proteoglycans in cancer	5	218	1.34	5.49e-05	9796.ENSECAP00000009480,9796.ENSECAP00000026906,9796.ENSECAP00000027608,9796.ENSECAP00000043812,9796.ENSECAP00000051244	TGFB1,MSN,MMP2,TWIST2,TGFB2
ecb04110	Cell cycle	4	129	1.47	0.00018	9796.ENSECAP00000009480,9796.ENSECAP00000025183,9796.ENSECAP00000032224,9796.ENSECAP00000051244	TGFB1,SMAD4,TGFB3,TGFB2
ecb04010	MAPK signaling pathway	5	312	1.18	0.00027	9796.ENSECAP00000009480,9796.ENSECAP00000013026,9796.ENSECAP00000032224,9796.ENSECAP00000046228,9796.ENSECAP00000051244	TGFB1,TGFBR2,TGFB3,TGFBR1,TGFB2
ecb05144	Malaria	4	155	1.39	0.00034	9796.ENSECAP00000009480,9796.ENSECAP00000019239,9796.ENSECAP00000032224,9796.ENSECAP00000051244	TGFB1,THBS2,TGFB3,TGFB2
ecb04659	Th17 cell differentiation	4	177	1.33	0.00053	9796.ENSECAP00000009480,9796.ENSECAP00000013026,9796.ENSECAP00000025183,9796.ENSECAP00000046228	TGFB1,TGFBR2,SMAD4,TGFBR1
ecb05211	Renal cell carcinoma	3	77	1.57	0.0011	9796.ENSECAP00000009480,9796.ENSECAP00000032224,9796.ENSECAP00000051244	TGFB1,TGFB3,TGFB2
ecb04520	Adherens junction	3	85	1.53	0.0015	9796.ENSECAP00000013026,9796.ENSECAP00000025183,9796.ENSECAP00000046228	TGFBR2,SMAD4,TGFBR1
ecb05410	Hypertrophic cardiomyopathy	3	89	1.51	0.0016	9796.ENSECAP00000009480,9796.ENSECAP00000032224,9796.ENSECAP00000051244	TGFB1,TGFB3,TGFB2
ecb04657	IL-17 signaling pathway	3	99	1.46	0.0021	9796.ENSECAP00000001652,9796.ENSECAP00000005084,9796.ENSECAP00000018911	MMP3,MMP13,MMP1
ecb05140	Leishmaniasis	3	104	1.44	0.0023	9796.ENSECAP00000009480,9796.ENSECAP00000032224,9796.ENSECAP00000051244	TGFB1,TGFB3,TGFB2
ecb05414	Dilated cardiomyopathy	3	113	1.4	0.0029	9796.ENSECAP00000009480,9796.ENSECAP00000032224,9796.ENSECAP00000051244	TGFB1,TGFB3,TGFB2
ecb05145	Toxoplasmosis	3	116	1.39	0.0030	9796.ENSECAP00000009480,9796.ENSECAP00000032224,9796.ENSECAP00000051244	TGFB1,TGFB3,TGFB2
ecb05321	Inflammatory bowel disease	3	138	1.32	0.0047	9796.ENSECAP00000009480,9796.ENSECAP00000032224,9796.ENSECAP00000051244	TGFB1,TGFB3,TGFB2
ecb05146	Amoebiasis	3	141	1.31	0.0049	9796.ENSECAP00000009480,9796.ENSECAP00000032224,9796.ENSECAP00000051244	TGFB1,TGFB3,TGFB2
ecb05206	MicroRNAs in cancer	3	167	1.23	0.0077	9796.ENSECAP00000004201,9796.ENSECAP00000040058,9796.ENSECAP00000051244	SHC1,VIM,TGFB2
ecb05219	Bladder cancer	2	47	1.61	0.0124	9796.ENSECAP00000018911,9796.ENSECAP00000027608	MMP1,MMP2
ecb05152	Tuberculosis	3	212	1.13	0.0142	9796.ENSECAP00000009480,9796.ENSECAP00000032224,9796.ENSECAP00000051244	TGFB1,TGFB3,TGFB2
ecb04917	Prolactin signaling pathway	2	75	1.4	0.0286	9796.ENSECAP00000004201,9796.ENSECAP00000014214	SHC1,TNFSF11

## Sheet: eKEGG brite hierarchy
SUPPLEMENTARY FILE 10
#term ID	term description	PHYSIOLOGICAL (P) /DISEASE (D)	BRITE MACRO CATEGORY OF PHYSIOLOGICAL PATHS					TOTAL PHYSIOLOGICAL PATH COUNT FOR EACH BRITE MACRO CATEGORY	PHYSIOLOGICAL PATH NUMBER COLLECTED
ecb04350	TGF-beta signaling pathway	P	GROWTH, DIFFERENTIATION AND SURVIVAL					GROWTH, DIFFERENTIATION AND SURVIVAL	8
ecb04926	Relaxin signaling pathway	P	ENDOCRINE SYSTEM					MORPHOGENESIS AND CELL MOTILITY	2
ecb04390	Hippo signaling pathway	P	GROWTH, DIFFERENTIATION AND SURVIVAL					NERVOUS SYSTEM	0
ecb04068	FoxO signaling pathway	P	GROWTH, DIFFERENTIATION AND SURVIVAL					ENDOCRINE SYSTEM	2
ecb04380	Osteoclast differentiation	P	GROWTH, DIFFERENTIATION AND SURVIVAL
ecb04060	Cytokine-cytokine receptor interaction	P	GROWTH, DIFFERENTIATION AND SURVIVAL
ecb04218	Cellular senescence	P	MORPHOGENESIS AND CELL MOTILITY
ecb04110	Cell cycle	P	GROWTH, DIFFERENTIATION AND SURVIVAL
ecb04010	MAPK signaling pathway	P	GROWTH, DIFFERENTIATION AND SURVIVAL
ecb04659	Th17 cell differentiation	P	GROWTH, DIFFERENTIATION AND SURVIVAL
ecb04520	Adherens junction	P	MORPHOGENESIS AND CELL MOTILITY
ecb04917	Prolactin signaling pathway	P	ENDOCRINE SYSTEM
ecb05220	Chronic myeloid leukemia	D	-
ecb04933	AGE-RAGE signaling pathway in diabetic complications	D	-
ecb05226	Gastric cancer	D	-
ecb05225	Hepatocellular carcinoma	D	-
ecb05212	Pancreatic cancer	D	-
ecb05210	Colorectal cancer	D	-
ecb05161	Hepatitis B	D	-
ecb05323	Rheumatoid arthritis	D	-
ecb05200	Pathways in cancer	D	-
ecb05166	Human T-cell leukemia virus 1 infection	D	-
ecb05142	Chagas disease	D	-
ecb05205	Proteoglycans in cancer	D	-
ecb05144	Malaria	D	-
ecb05211	Renal cell carcinoma	D	-
ecb05410	Hypertrophic cardiomyopathy	D	-
ecb04657	IL-17 signaling pathway	D	-
ecb05140	Leishmaniasis	D	-
ecb05414	Dilated cardiomyopathy	D	-
ecb05145	Toxoplasmosis	D	-
ecb05321	Inflammatory bowel disease	D	-
ecb05146	Amoebiasis	D	-
ecb05206	MicroRNAs in cancer	D	-
ecb05219	Bladder cancer	D	-
ecb05152	Tuberculosis	D	-

## Sheet: bKEGG Enriched TendonNET
SUPPLEMENTARY FILE 10
#term ID	term description	observed gene count	background gene count	strength	false discovery rate	matching proteins in your network (IDs)	matching proteins in your network (labels)
bta04350	TGF-beta signaling pathway	9	85	1.98	1.18e-13	9913.ENSBTAP00000004562,9913.ENSBTAP00000009081,9913.ENSBTAP00000015925,9913.ENSBTAP00000017649,9913.ENSBTAP00000018986,9913.ENSBTAP00000024010,9913.ENSBTAP00000027261,9913.ENSBTAP00000043987,9913.ENSBTAP00000055112	DCN,SMAD4,TGFB3,SMAD2,ZFYVE9,TGFBR1,TGFB1,SMAD7,TGFBR2
bta05205	Proteoglycans in cancer	10	180	1.7	4.56e-13	9913.ENSBTAP00000004562,9913.ENSBTAP00000010530,9913.ENSBTAP00000010925,9913.ENSBTAP00000013173,9913.ENSBTAP00000017649,9913.ENSBTAP00000018261,9913.ENSBTAP00000022744,9913.ENSBTAP00000027261,9913.ENSBTAP00000052015,9913.ENSBTAP00000054678	DCN,TLR2,FN1,ITGB3,SMAD2,ITGA5,HSPG2,TGFB1,ITGB1,SDC4
bta04512	ECM-receptor interaction	8	77	1.98	2.55e-12	9913.ENSBTAP00000004833,9913.ENSBTAP00000010925,9913.ENSBTAP00000011972,9913.ENSBTAP00000013173,9913.ENSBTAP00000018261,9913.ENSBTAP00000022744,9913.ENSBTAP00000052015,9913.ENSBTAP00000054678	ITGB8,FN1,ITGB6,ITGB3,ITGA5,HSPG2,ITGB1,SDC4
bta05410	Hypertrophic cardiomyopathy	7	84	1.88	4.25e-10	9913.ENSBTAP00000004833,9913.ENSBTAP00000011972,9913.ENSBTAP00000013173,9913.ENSBTAP00000015925,9913.ENSBTAP00000018261,9913.ENSBTAP00000027261,9913.ENSBTAP00000052015	ITGB8,ITGB6,ITGB3,TGFB3,ITGA5,TGFB1,ITGB1
bta05414	Dilated cardiomyopathy	7	89	1.85	4.99e-10	9913.ENSBTAP00000004833,9913.ENSBTAP00000011972,9913.ENSBTAP00000013173,9913.ENSBTAP00000015925,9913.ENSBTAP00000018261,9913.ENSBTAP00000027261,9913.ENSBTAP00000052015	ITGB8,ITGB6,ITGB3,TGFB3,ITGA5,TGFB1,ITGB1
bta04933	AGE-RAGE signaling pathway in diabetic complications	7	92	1.84	5.19e-10	9913.ENSBTAP00000009081,9913.ENSBTAP00000010925,9913.ENSBTAP00000015925,9913.ENSBTAP00000017649,9913.ENSBTAP00000024010,9913.ENSBTAP00000027261,9913.ENSBTAP00000055112	SMAD4,FN1,TGFB3,SMAD2,TGFBR1,TGFB1,TGFBR2
bta04390	Hippo signaling pathway	7	139	1.66	6.45e-09	9913.ENSBTAP00000009081,9913.ENSBTAP00000015925,9913.ENSBTAP00000017649,9913.ENSBTAP00000024010,9913.ENSBTAP00000027261,9913.ENSBTAP00000043987,9913.ENSBTAP00000055112	SMAD4,TGFB3,SMAD2,TGFBR1,TGFB1,SMAD7,TGFBR2
bta05212	Pancreatic cancer	6	67	1.91	6.45e-09	9913.ENSBTAP00000009081,9913.ENSBTAP00000015925,9913.ENSBTAP00000017649,9913.ENSBTAP00000024010,9913.ENSBTAP00000027261,9913.ENSBTAP00000055112	SMAD4,TGFB3,SMAD2,TGFBR1,TGFB1,TGFBR2
bta05210	Colorectal cancer	6	77	1.85	1.10e-08	9913.ENSBTAP00000009081,9913.ENSBTAP00000015925,9913.ENSBTAP00000017649,9913.ENSBTAP00000024010,9913.ENSBTAP00000027261,9913.ENSBTAP00000055112	SMAD4,TGFB3,SMAD2,TGFBR1,TGFB1,TGFBR2
bta05161	Hepatitis B	7	158	1.6	1.16e-08	9913.ENSBTAP00000009081,9913.ENSBTAP00000010530,9913.ENSBTAP00000015925,9913.ENSBTAP00000022744,9913.ENSBTAP00000024010,9913.ENSBTAP00000027261,9913.ENSBTAP00000055112	SMAD4,TLR2,TGFB3,HSPG2,TGFBR1,TGFB1,TGFBR2
bta05142	Chagas disease	6	106	1.71	5.62e-08	9913.ENSBTAP00000010530,9913.ENSBTAP00000015925,9913.ENSBTAP00000017649,9913.ENSBTAP00000024010,9913.ENSBTAP00000027261,9913.ENSBTAP00000055112	TLR2,TGFB3,SMAD2,TGFBR1,TGFB1,TGFBR2
bta05226	Gastric cancer	6	133	1.61	1.90e-07	9913.ENSBTAP00000009081,9913.ENSBTAP00000015925,9913.ENSBTAP00000017649,9913.ENSBTAP00000024010,9913.ENSBTAP00000027261,9913.ENSBTAP00000055112	SMAD4,TGFB3,SMAD2,TGFBR1,TGFB1,TGFBR2
bta05220	Chronic myeloid leukemia	5	69	1.82	3.60e-07	9913.ENSBTAP00000009081,9913.ENSBTAP00000015925,9913.ENSBTAP00000024010,9913.ENSBTAP00000027261,9913.ENSBTAP00000055112	SMAD4,TGFB3,TGFBR1,TGFB1,TGFBR2
bta05225	Hepatocellular carcinoma	6	154	1.55	3.60e-07	9913.ENSBTAP00000009081,9913.ENSBTAP00000015925,9913.ENSBTAP00000017649,9913.ENSBTAP00000024010,9913.ENSBTAP00000027261,9913.ENSBTAP00000055112	SMAD4,TGFB3,SMAD2,TGFBR1,TGFB1,TGFBR2
bta05412	Arrhythmogenic right ventricular cardiomyopathy	5	68	1.82	3.60e-07	9913.ENSBTAP00000004833,9913.ENSBTAP00000011972,9913.ENSBTAP00000013173,9913.ENSBTAP00000018261,9913.ENSBTAP00000052015	ITGB8,ITGB6,ITGB3,ITGA5,ITGB1
bta04510	Focal adhesion	6	169	1.51	5.65e-07	9913.ENSBTAP00000004833,9913.ENSBTAP00000010925,9913.ENSBTAP00000011972,9913.ENSBTAP00000013173,9913.ENSBTAP00000018261,9913.ENSBTAP00000052015	ITGB8,FN1,ITGB6,ITGB3,ITGA5,ITGB1
bta05200	Pathways in cancer	8	488	1.17	6.19e-07	9913.ENSBTAP00000009081,9913.ENSBTAP00000010925,9913.ENSBTAP00000015925,9913.ENSBTAP00000017649,9913.ENSBTAP00000024010,9913.ENSBTAP00000027261,9913.ENSBTAP00000052015,9913.ENSBTAP00000055112	SMAD4,FN1,TGFB3,SMAD2,TGFBR1,TGFB1,ITGB1,TGFBR2
bta04151	PI3K-Akt signaling pathway	7	331	1.28	9.28e-07	9913.ENSBTAP00000004833,9913.ENSBTAP00000010530,9913.ENSBTAP00000010925,9913.ENSBTAP00000011972,9913.ENSBTAP00000013173,9913.ENSBTAP00000018261,9913.ENSBTAP00000052015	ITGB8,TLR2,FN1,ITGB6,ITGB3,ITGA5,ITGB1
bta04810	Regulation of actin cytoskeleton	6	188	1.46	9.28e-07	9913.ENSBTAP00000004833,9913.ENSBTAP00000010925,9913.ENSBTAP00000011972,9913.ENSBTAP00000013173,9913.ENSBTAP00000018261,9913.ENSBTAP00000052015	ITGB8,FN1,ITGB6,ITGB3,ITGA5,ITGB1
bta05166	Human T-cell leukemia virus 1 infection	6	213	1.41	1.72e-06	9913.ENSBTAP00000009081,9913.ENSBTAP00000015925,9913.ENSBTAP00000017649,9913.ENSBTAP00000024010,9913.ENSBTAP00000027261,9913.ENSBTAP00000055112	SMAD4,TGFB3,SMAD2,TGFBR1,TGFB1,TGFBR2
bta04659	Th17 cell differentiation	5	107	1.63	1.94e-06	9913.ENSBTAP00000009081,9913.ENSBTAP00000017649,9913.ENSBTAP00000024010,9913.ENSBTAP00000027261,9913.ENSBTAP00000055112	SMAD4,SMAD2,TGFBR1,TGFB1,TGFBR2
bta04068	FoxO signaling pathway	5	118	1.59	2.95e-06	9913.ENSBTAP00000009081,9913.ENSBTAP00000015925,9913.ENSBTAP00000024010,9913.ENSBTAP00000027261,9913.ENSBTAP00000055112	SMAD4,TGFB3,TGFBR1,TGFB1,TGFBR2
bta04218	Cellular senescence	5	148	1.49	8.37e-06	9913.ENSBTAP00000015925,9913.ENSBTAP00000017649,9913.ENSBTAP00000024010,9913.ENSBTAP00000027261,9913.ENSBTAP00000055112	TGFB3,SMAD2,TGFBR1,TGFB1,TGFBR2
bta05165	Human papillomavirus infection	6	303	1.26	1.08e-05	9913.ENSBTAP00000004833,9913.ENSBTAP00000010925,9913.ENSBTAP00000011972,9913.ENSBTAP00000013173,9913.ENSBTAP00000018261,9913.ENSBTAP00000052015	ITGB8,FN1,ITGB6,ITGB3,ITGA5,ITGB1
bta05321	Inflammatory bowel disease	4	67	1.73	1.35e-05	9913.ENSBTAP00000010530,9913.ENSBTAP00000015925,9913.ENSBTAP00000017649,9913.ENSBTAP00000027261	TLR2,TGFB3,SMAD2,TGFB1
bta05140	Leishmaniasis	4	72	1.7	1.70e-05	9913.ENSBTAP00000010530,9913.ENSBTAP00000015925,9913.ENSBTAP00000027261,9913.ENSBTAP00000052015	TLR2,TGFB3,TGFB1,ITGB1
bta05145	Toxoplasmosis	4	102	1.55	6.21e-05	9913.ENSBTAP00000010530,9913.ENSBTAP00000015925,9913.ENSBTAP00000027261,9913.ENSBTAP00000052015	TLR2,TGFB3,TGFB1,ITGB1
bta05146	Amoebiasis	4	105	1.54	6.69e-05	9913.ENSBTAP00000010530,9913.ENSBTAP00000010925,9913.ENSBTAP00000015925,9913.ENSBTAP00000027261	TLR2,FN1,TGFB3,TGFB1
bta04380	Osteoclast differentiation	4	113	1.51	8.56e-05	9913.ENSBTAP00000013173,9913.ENSBTAP00000024010,9913.ENSBTAP00000027261,9913.ENSBTAP00000055112	ITGB3,TGFBR1,TGFB1,TGFBR2
bta04110	Cell cycle	4	118	1.49	9.77e-05	9913.ENSBTAP00000009081,9913.ENSBTAP00000015925,9913.ENSBTAP00000017649,9913.ENSBTAP00000027261	SMAD4,TGFB3,SMAD2,TGFB1
bta04926	Relaxin signaling pathway	4	121	1.48	0.00010	9913.ENSBTAP00000017649,9913.ENSBTAP00000024010,9913.ENSBTAP00000027261,9913.ENSBTAP00000055112	SMAD2,TGFBR1,TGFB1,TGFBR2
bta04145	Phagosome	4	149	1.39	0.00022	9913.ENSBTAP00000010530,9913.ENSBTAP00000013173,9913.ENSBTAP00000018261,9913.ENSBTAP00000052015	TLR2,ITGB3,ITGA5,ITGB1
bta05144	Malaria	3	48	1.75	0.00023	9913.ENSBTAP00000010530,9913.ENSBTAP00000015925,9913.ENSBTAP00000027261	TLR2,TGFB3,TGFB1
bta04520	Adherens junction	3	60	1.66	0.00043	9913.ENSBTAP00000009081,9913.ENSBTAP00000024010,9913.ENSBTAP00000055112	SMAD4,TGFBR1,TGFBR2
bta05100	Bacterial invasion of epithelial cells	3	66	1.62	0.00055	9913.ENSBTAP00000010925,9913.ENSBTAP00000018261,9913.ENSBTAP00000052015	FN1,ITGA5,ITGB1
bta04144	Endocytosis	4	221	1.22	0.00089	9913.ENSBTAP00000017649,9913.ENSBTAP00000018986,9913.ENSBTAP00000024010,9913.ENSBTAP00000055112	SMAD2,ZFYVE9,TGFBR1,TGFBR2
bta05323	Rheumatoid arthritis	3	91	1.48	0.0013	9913.ENSBTAP00000010530,9913.ENSBTAP00000015925,9913.ENSBTAP00000027261	TLR2,TGFB3,TGFB1
bta04010	MAPK signaling pathway	4	266	1.14	0.0017	9913.ENSBTAP00000015925,9913.ENSBTAP00000024010,9913.ENSBTAP00000027261,9913.ENSBTAP00000055112	TGFB3,TGFBR1,TGFB1,TGFBR2
bta04060	Cytokine-cytokine receptor interaction	4	283	1.11	0.0021	9913.ENSBTAP00000015925,9913.ENSBTAP00000024010,9913.ENSBTAP00000027261,9913.ENSBTAP00000055112	TGFB3,TGFBR1,TGFB1,TGFBR2
bta05135	Yersinia infection	3	124	1.34	0.0029	9913.ENSBTAP00000010925,9913.ENSBTAP00000018261,9913.ENSBTAP00000052015	FN1,ITGA5,ITGB1
bta04371	Apelin signaling pathway	3	129	1.32	0.0032	9913.ENSBTAP00000009081,9913.ENSBTAP00000017649,9913.ENSBTAP00000024010	SMAD4,SMAD2,TGFBR1
bta04514	Cell adhesion molecules	3	140	1.29	0.0039	9913.ENSBTAP00000004833,9913.ENSBTAP00000052015,9913.ENSBTAP00000054678	ITGB8,ITGB1,SDC4
bta05152	Tuberculosis	3	171	1.2	0.0068	9913.ENSBTAP00000010530,9913.ENSBTAP00000015925,9913.ENSBTAP00000027261	TLR2,TGFB3,TGFB1
bta05211	Renal cell carcinoma	2	61	1.47	0.0163	9913.ENSBTAP00000015925,9913.ENSBTAP00000027261	TGFB3,TGFB1
bta05133	Pertussis	2	70	1.41	0.0208	9913.ENSBTAP00000018261,9913.ENSBTAP00000052015	ITGA5,ITGB1
bta05168	Herpes simplex virus 1 infection	3	289	0.97	0.0278	9913.ENSBTAP00000010530,9913.ENSBTAP00000013173,9913.ENSBTAP00000018261	TLR2,ITGB3,ITGA5
bta05222	Small cell lung cancer	2	84	1.34	0.0282	9913.ENSBTAP00000010925,9913.ENSBTAP00000052015	FN1,ITGB1
bta04640	Hematopoietic cell lineage	2	92	1.3	0.0328	9913.ENSBTAP00000013173,9913.ENSBTAP00000018261	ITGB3,ITGA5
bta04611	Platelet activation	2	112	1.21	0.0467	9913.ENSBTAP00000013173,9913.ENSBTAP00000052015	ITGB3,ITGB1

## Sheet: bKEGG brite hierarchy
SUPPLEMENTARY FILE 10
#term ID	term description	PHYSIOLOGICAL (P) /DISEASE (D)	BRITE MACRO CATEGORY OF PHYSIOLOGICAL PATHS		TOTAL PHYSIOLOGICAL PATH COUNT FOR EACH BRITE MACRO CATEGORY	PHYSIOLOGICAL PATH NUMBER COLLECTED
bta04350	TGF-beta signaling pathway	P	GROWTH, DIFFERENTIATION AND SURVIVAL		GROWTH, DIFFERENTIATION AND SURVIVAL	13
bta04512	ECM-receptor interaction	P	MORPHOGENESIS AND CELL MOTILITY		MORPHOGENESIS AND CELL MOTILITY	6
bta04390	Hippo signaling pathway	P	GROWTH, DIFFERENTIATION AND SURVIVAL		NERVOUS SYSTEM	0
bta04510	Focal adhesion	P	MORPHOGENESIS AND CELL MOTILITY		ENDOCRINE SYSTEM	1
bta04151	PI3K-Akt signaling pathway	P	GROWTH, DIFFERENTIATION AND SURVIVAL
bta04810	Regulation of actin cytoskeleton	P	MORPHOGENESIS AND CELL MOTILITY
bta04659	Th17 cell differentiation	P	GROWTH, DIFFERENTIATION AND SURVIVAL
bta04068	FoxO signaling pathway	P	GROWTH, DIFFERENTIATION AND SURVIVAL
bta04218	Cellular senescence	P	MORPHOGENESIS AND CELL MOTILITY
bta04380	Osteoclast differentiation	P	GROWTH, DIFFERENTIATION AND SURVIVAL
bta04110	Cell cycle	P	GROWTH, DIFFERENTIATION AND SURVIVAL
bta04926	Relaxin signaling pathway	P	ENDOCRINE SYSTEM
bta04145	Phagosome	P	GROWTH, DIFFERENTIATION AND SURVIVAL
bta04520	Adherens junction	P	MORPHOGENESIS AND CELL MOTILITY
bta04144	Endocytosis	P	GROWTH, DIFFERENTIATION AND SURVIVAL
bta04010	MAPK signaling pathway	P	GROWTH, DIFFERENTIATION AND SURVIVAL
bta04060	Cytokine-cytokine receptor interaction	P	GROWTH, DIFFERENTIATION AND SURVIVAL
bta04371	Apelin signaling pathway	P	GROWTH, DIFFERENTIATION AND SURVIVAL
bta04514	Cell adhesion molecules	P	MORPHOGENESIS AND CELL MOTILITY
bta04640	Hematopoietic cell lineage	P	GROWTH, DIFFERENTIATION AND SURVIVAL
bta05205	Proteoglycans in cancer	D	-
bta05410	Hypertrophic cardiomyopathy	D	-
bta05414	Dilated cardiomyopathy	D	-
bta04933	AGE-RAGE signaling pathway in diabetic complications	D	-
bta05212	Pancreatic cancer	D	-
bta05210	Colorectal cancer	D	-
bta05161	Hepatitis B	D	-
bta05142	Chagas disease	D	-
bta05226	Gastric cancer	D	-
bta05220	Chronic myeloid leukemia	D	-
bta05225	Hepatocellular carcinoma	D	-
bta05412	Arrhythmogenic right ventricular cardiomyopathy	D	-
bta05200	Pathways in cancer	D	-
bta05166	Human T-cell leukemia virus 1 infection	D	-
bta05165	Human papillomavirus infection	D	-
bta05321	Inflammatory bowel disease	D	-
bta05140	Leishmaniasis	D	-
bta05145	Toxoplasmosis	D	-
bta05146	Amoebiasis	D	-
bta05144	Malaria	D	-
bta05100	Bacterial invasion of epithelial cells	D	-
bta05323	Rheumatoid arthritis	D	-
bta05135	Yersinia infection	D	-
bta05152	Tuberculosis	D	-
bta05211	Renal cell carcinoma	D	-
bta05133	Pertussis	D	-
bta05168	Herpes simplex virus 1 infection	D	-
bta05222	Small cell lung cancer	D	-
bta04611	Platelet activation	D	-

[truncated: 4 more sheets: gKEGG Enriched TendonNET, gKEGG brite hierarchy, dKEGG Enriched TendonNET, dKEGG brite hierarchy]
